# Supplementary material for: Reducing the cost and assessing the performance of a novel adult mass-rearing cage for the dengue, chikungunya, yellow fever and Zika vector, Aedes aegypti (Linnaeus)
Source: PubMed Central journal article supplement (PMC6779276; doi:10.1371/journal.pntd.0007775), 2019-09-25
Supplement: pntd.0007775.s001.pdf [file pntd.0007775.s001.pdf]

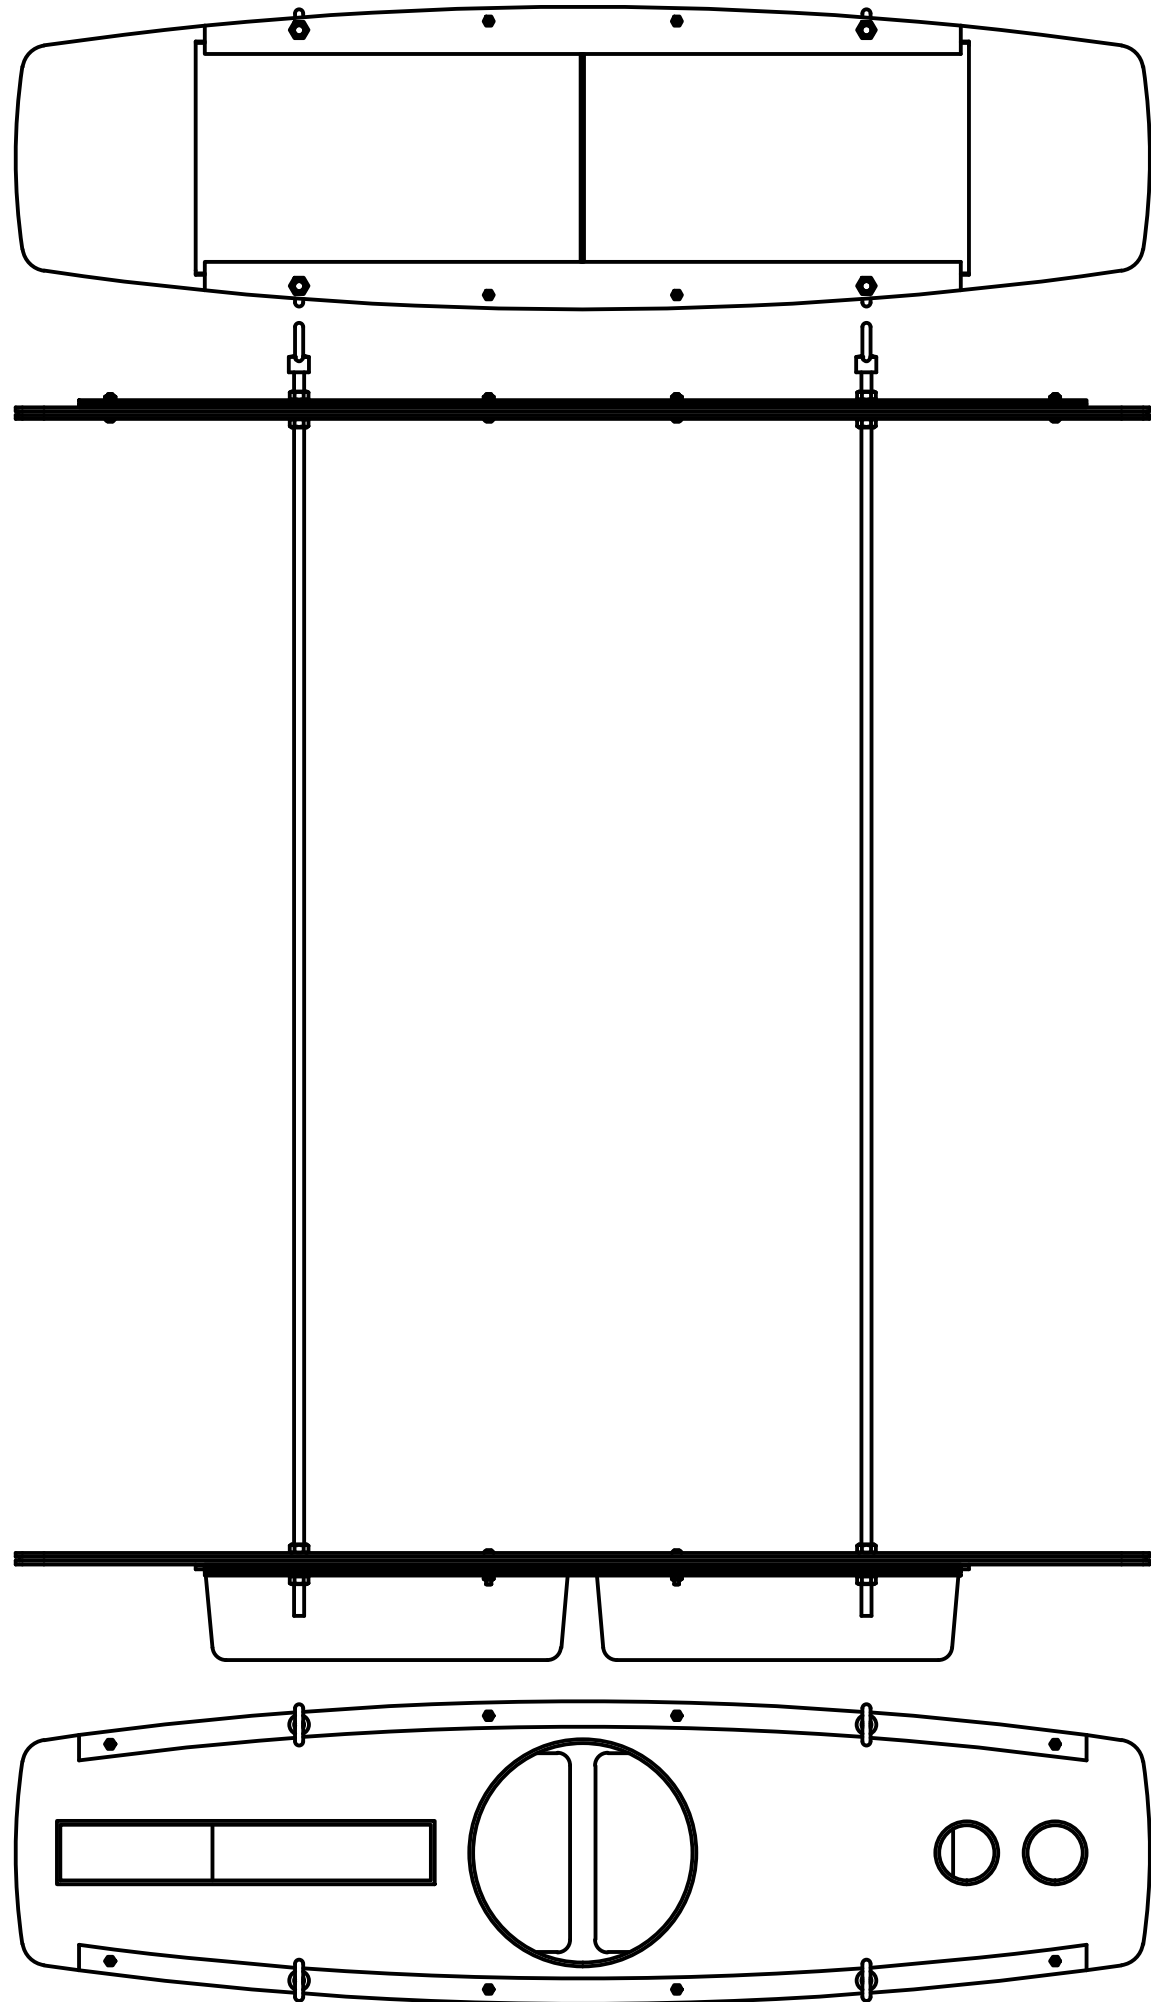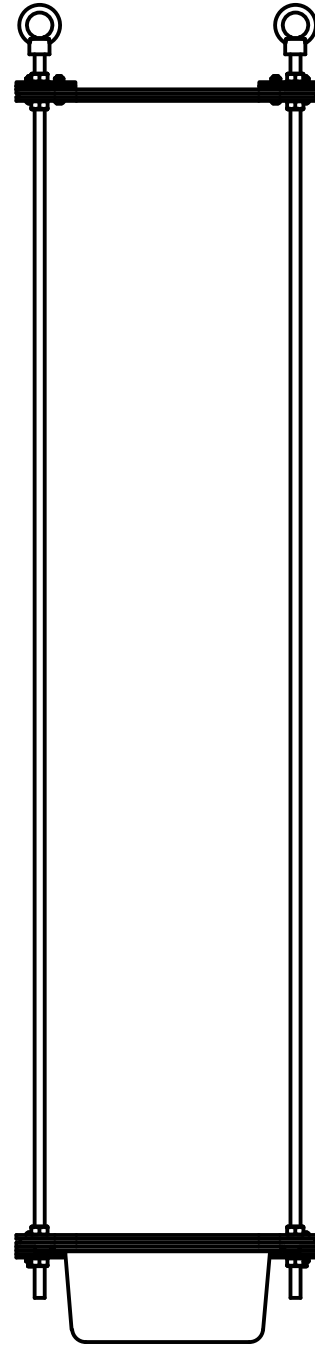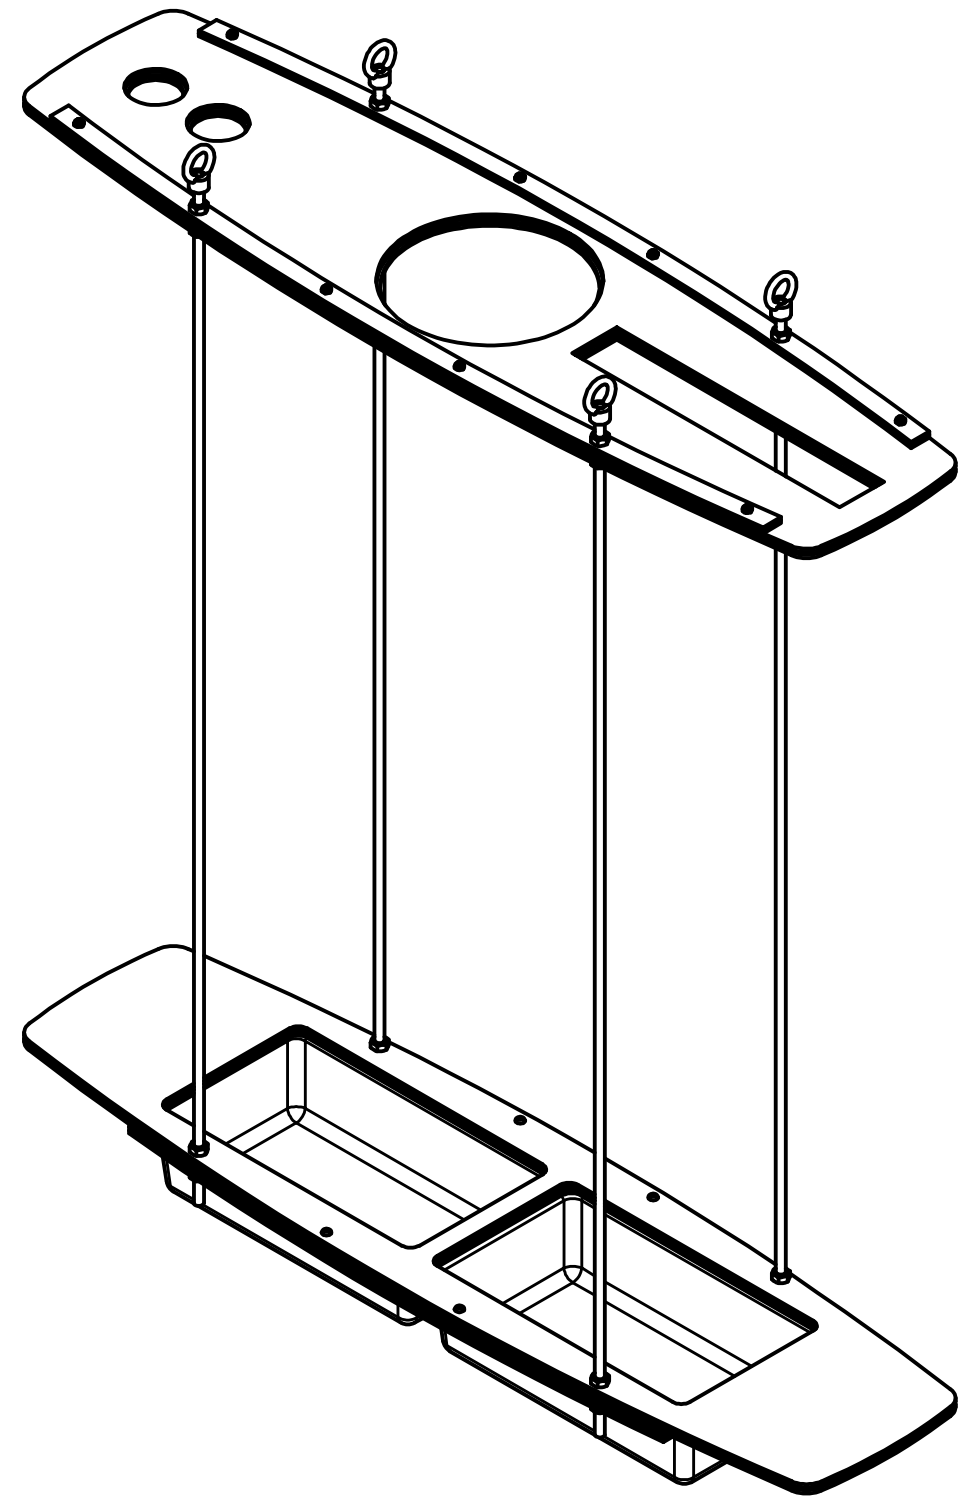

|          |                                   |            |  |        |                                    |
|----------|-----------------------------------|------------|--|--------|------------------------------------|
|          | Name                              | Date       |  |        | <b>Insect Pest Control Section</b> |
| Designed | G. Salvador-Herranz               | 10/12/2018 |  |        |                                    |
| Revised  | R. Argilés                        | 10/12/2018 |  |        |                                    |
| Scale    | <b>PMMA Aedes Cage v1</b>         |            |  | Number | AEDES_CAGE_V1                      |
| 1:6      | Complete Structure - Overall View |            |  | Sheet  | 1/15                               |
| mm       |                                   |            |  |        |                                    |
