# Supplementary material for: Reducing the cost and assessing the performance of a novel adult mass-rearing cage for the dengue, chikungunya, yellow fever and Zika vector, Aedes aegypti (Linnaeus)
Source: PubMed Central journal article supplement (PMC6779276; doi:10.1371/journal.pntd.0007775), 2019-09-25
Supplement: pntd.0007775.s002.pdf [file pntd.0007775.s002.pdf]

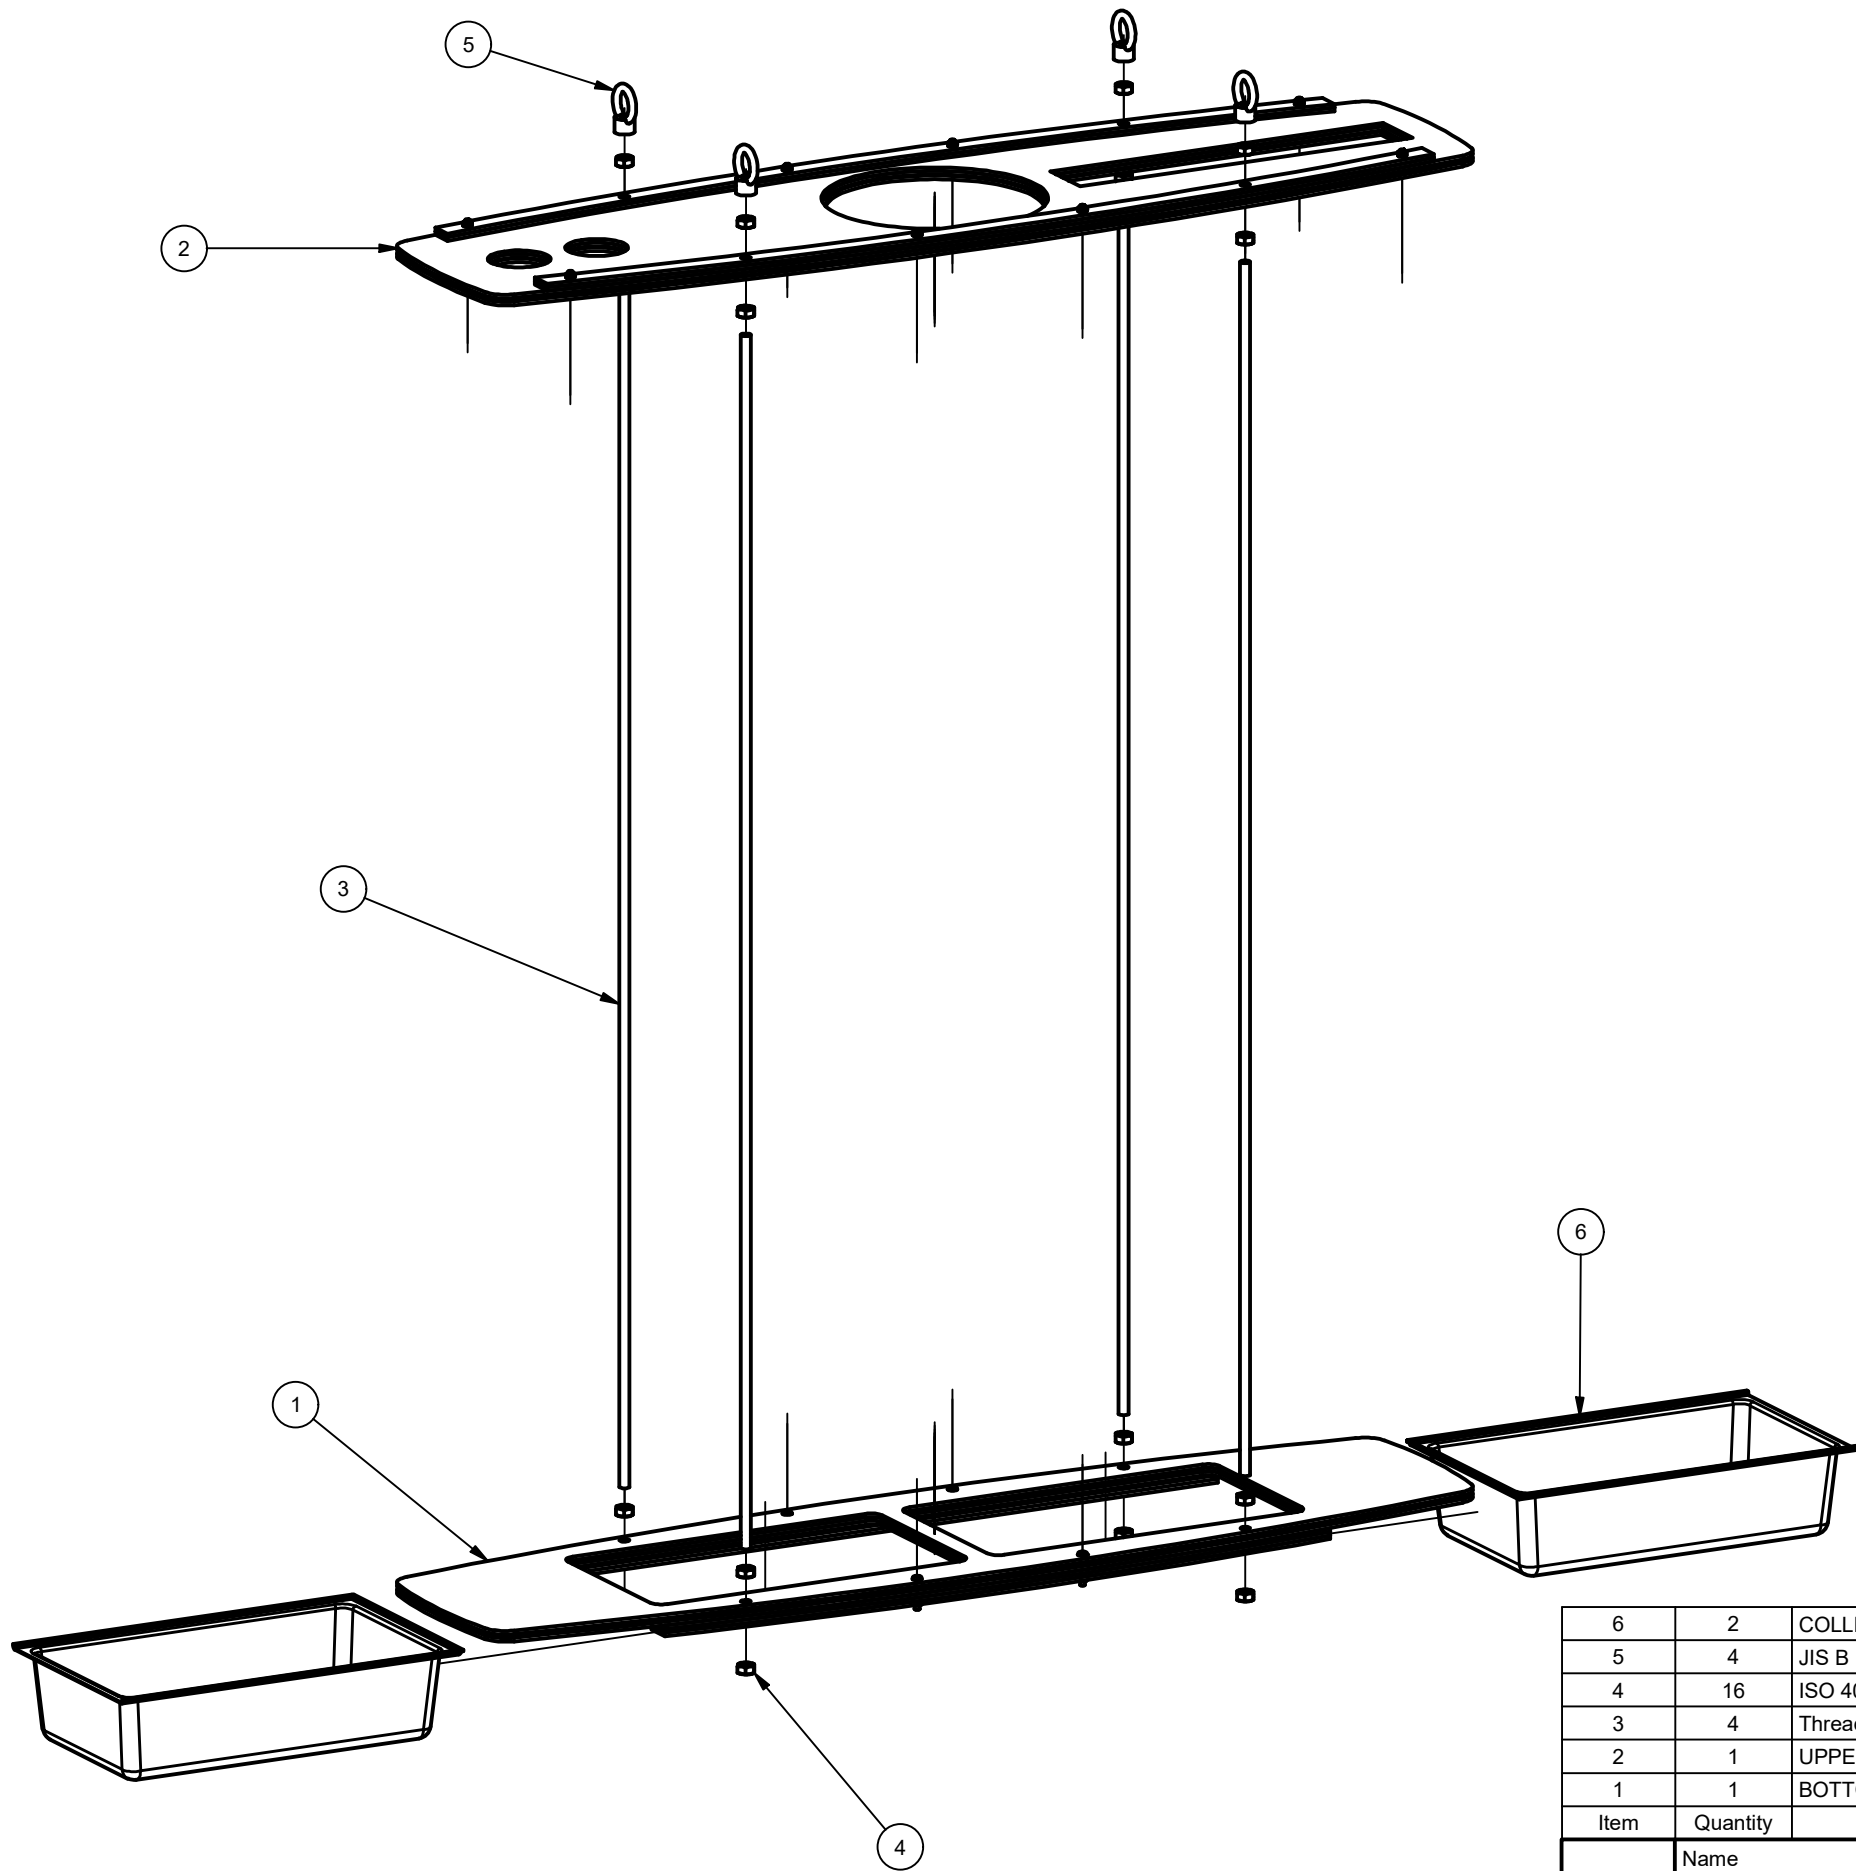

| Item | Quantity | Part                                    | Description                        |
|------|----------|-----------------------------------------|------------------------------------|
| 6    | 2        | COLLECT_TRAY                            | Egg collection tray. ABS 1mm.      |
| 5    | 4        | JIS B 1169 - M 8                        | Eyebolt nut M8                     |
| 4    | 16       | ISO 4032 - M8                           | Hexagonal nut M8. Stainless steel. |
| 3    | 4        | Threaded rods GB/T 15389-1994 M8 x 1000 | Threaded rods M8. Stainless steel. |
| 2    | 1        | UPPER_PLATE                             | PMMA Upper Plate                   |
| 1    | 1        | BOTTOM_PLATE                            | PMMA Bottom Plate                  |

| Name     |                     | Date       |  | <br><small>Joint FAO/IAEA Programme<br/>Nuclear Techniques in Food and Agriculture</small> | <b>Insect Pest Control Section</b> |                                |
|----------|---------------------|------------|--|--------------------------------------------------------------------------------------------|------------------------------------|--------------------------------|
| Designed | G. Salvador-Herranz | 10/12/2018 |  |                                                                                            |                                    |                                |
| Revised  | R. Argilés          | 10/12/2018 |  |                                                                                            |                                    |                                |
| Scale    | <b>1:6</b><br>mm    |            |  | <b>PMMA Aedes Cage v1</b><br>Complete Structure - Assembly                                 |                                    | Number<br><b>AEDES_CAGE_V1</b> |
|          |                     |            |  |                                                                                            |                                    | Sheet<br><b>2/15</b>           |
