# Supplementary material for: Reducing the cost and assessing the performance of a novel adult mass-rearing cage for the dengue, chikungunya, yellow fever and Zika vector, Aedes aegypti (Linnaeus)
Source: PubMed Central journal article supplement (PMC6779276; doi:10.1371/journal.pntd.0007775), 2019-09-25
Supplement: pntd.0007775.s003.pdf [file pntd.0007775.s003.pdf]

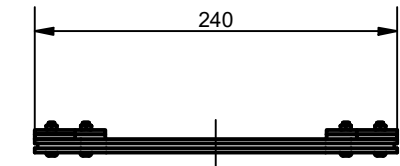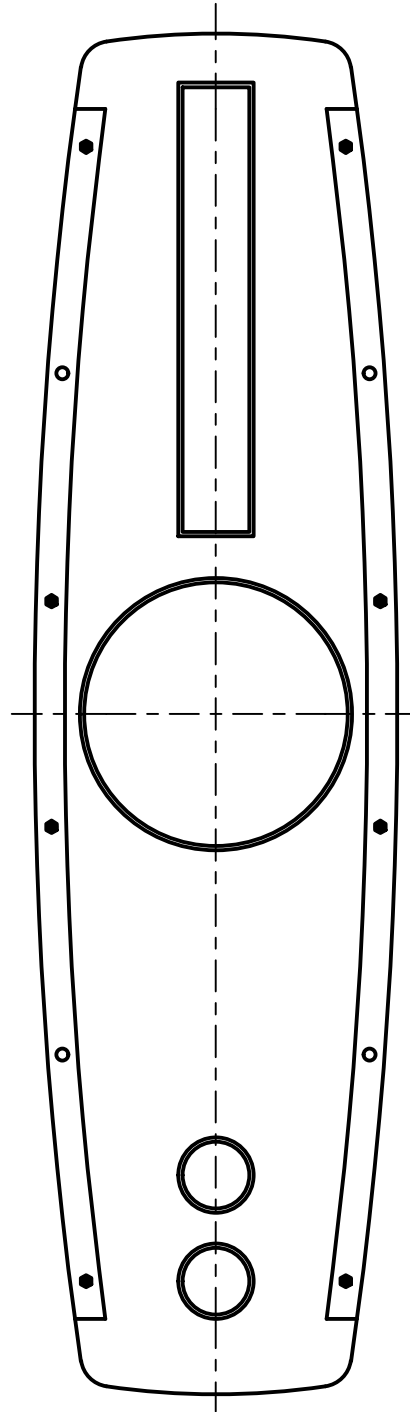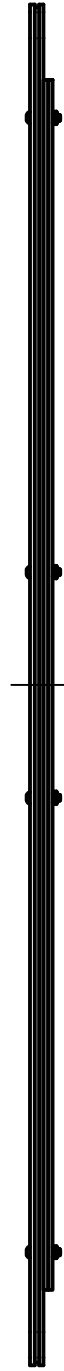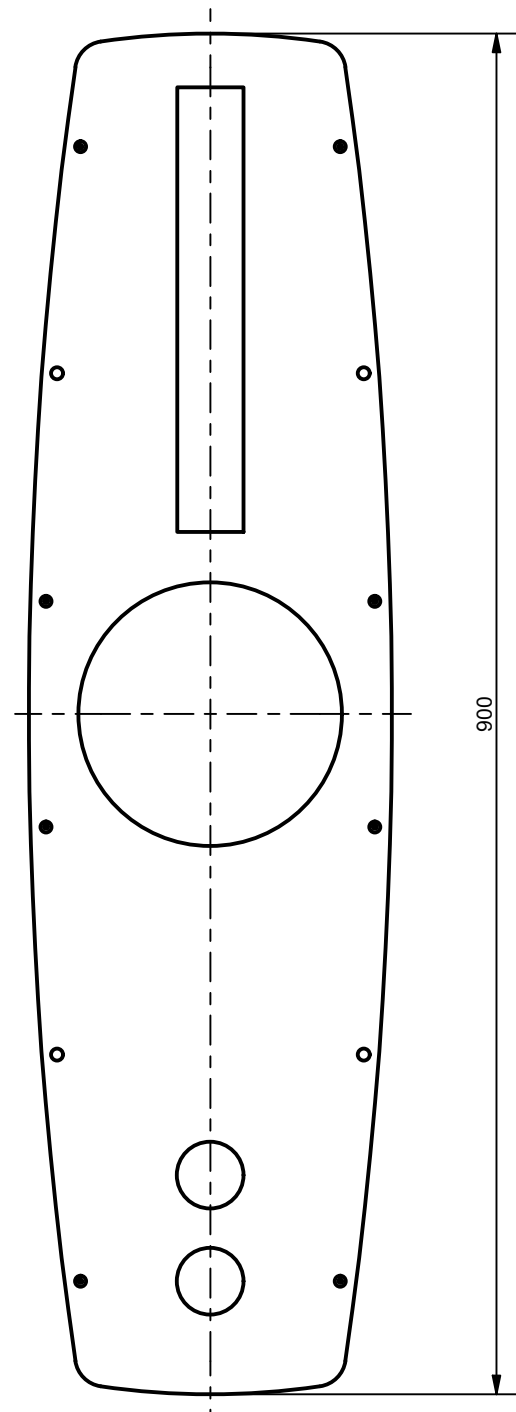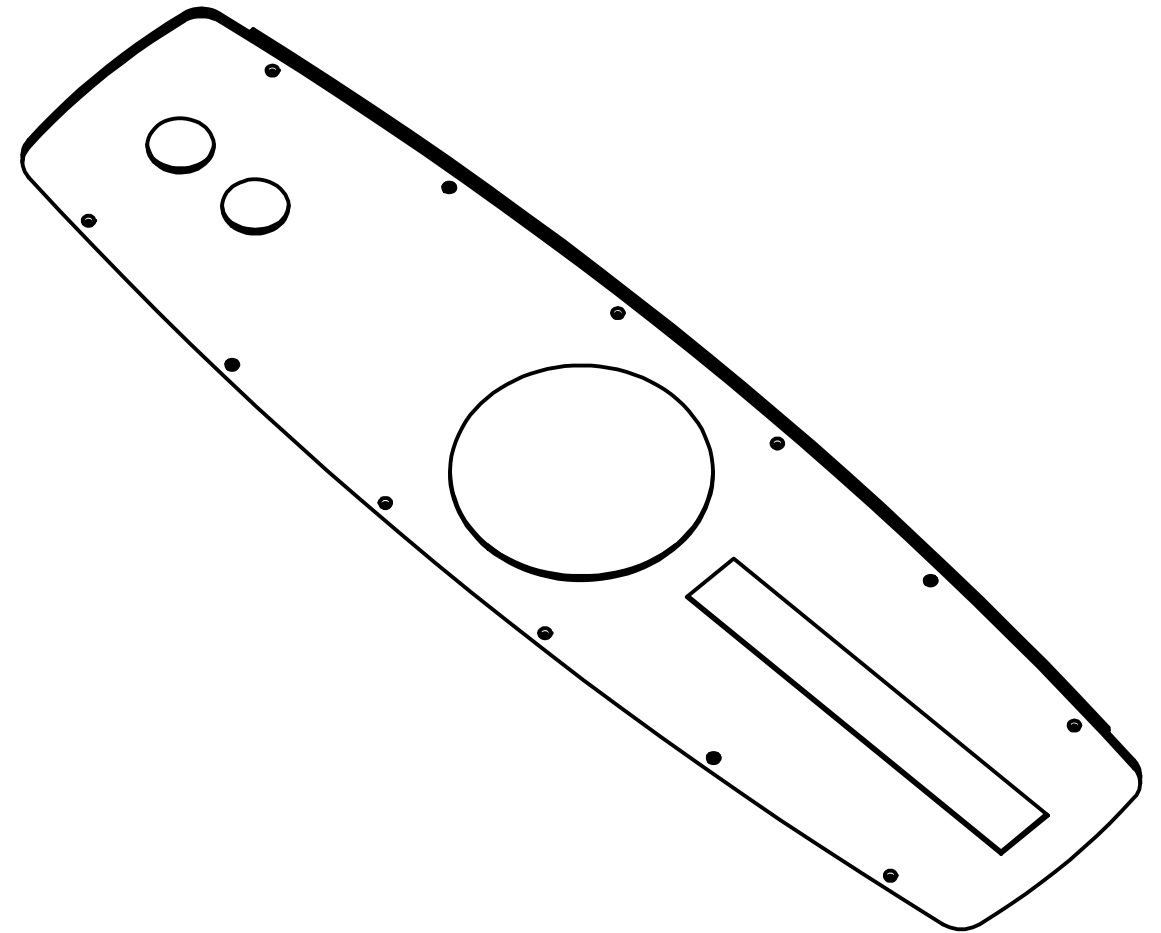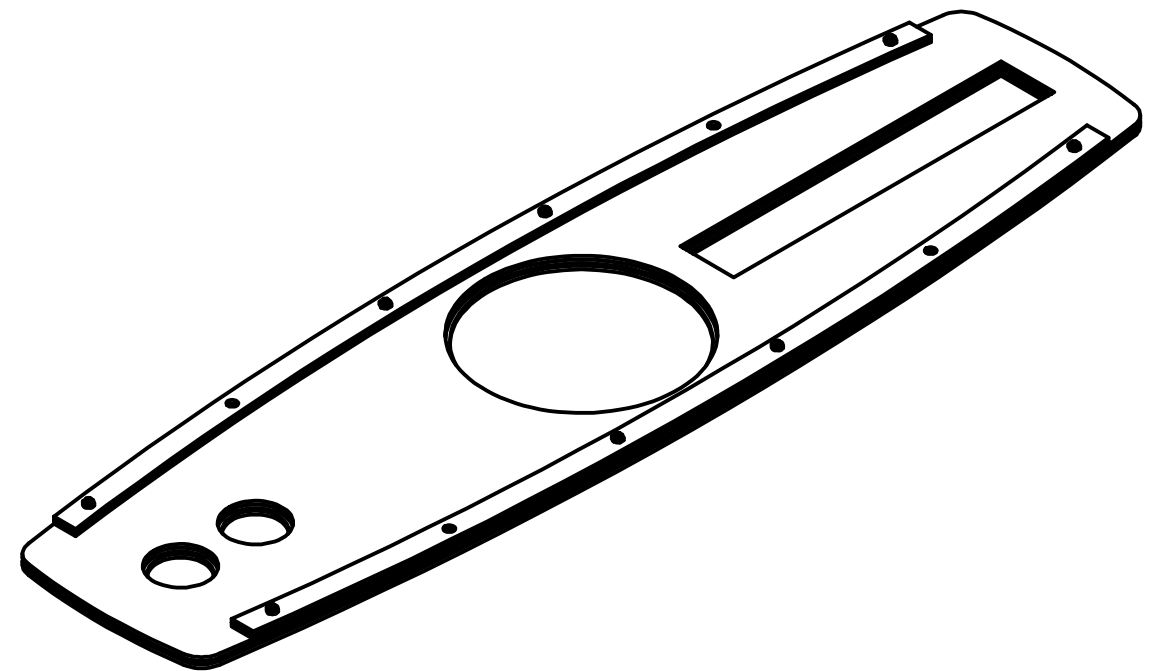

|           |                                                                       |            |  |        |                                    |
|-----------|-----------------------------------------------------------------------|------------|--|--------|------------------------------------|
|           | Name                                                                  | Date       |  |        | <b>Insect Pest Control Section</b> |
| Designed  | G. Salvador-Herranz                                                   | 10/12/2018 |  |        |                                    |
| Revised   | R. Argilés                                                            | 10/12/2018 |  |        |                                    |
| Scale     | <b>PMMA Aedes Cage v1</b><br>Upper Plate - Overall View (UPPER_PLATE) |            |  | Number | AEDES_CAGE_V1                      |
| 1:5<br>mm |                                                                       |            |  | Sheet  | 3/15                               |
