# Supplementary material for: Reducing the cost and assessing the performance of a novel adult mass-rearing cage for the dengue, chikungunya, yellow fever and Zika vector, Aedes aegypti (Linnaeus)
Source: PubMed Central journal article supplement (PMC6779276; doi:10.1371/journal.pntd.0007775), 2019-09-25
Supplement: pntd.0007775.s004.pdf [file pntd.0007775.s004.pdf]

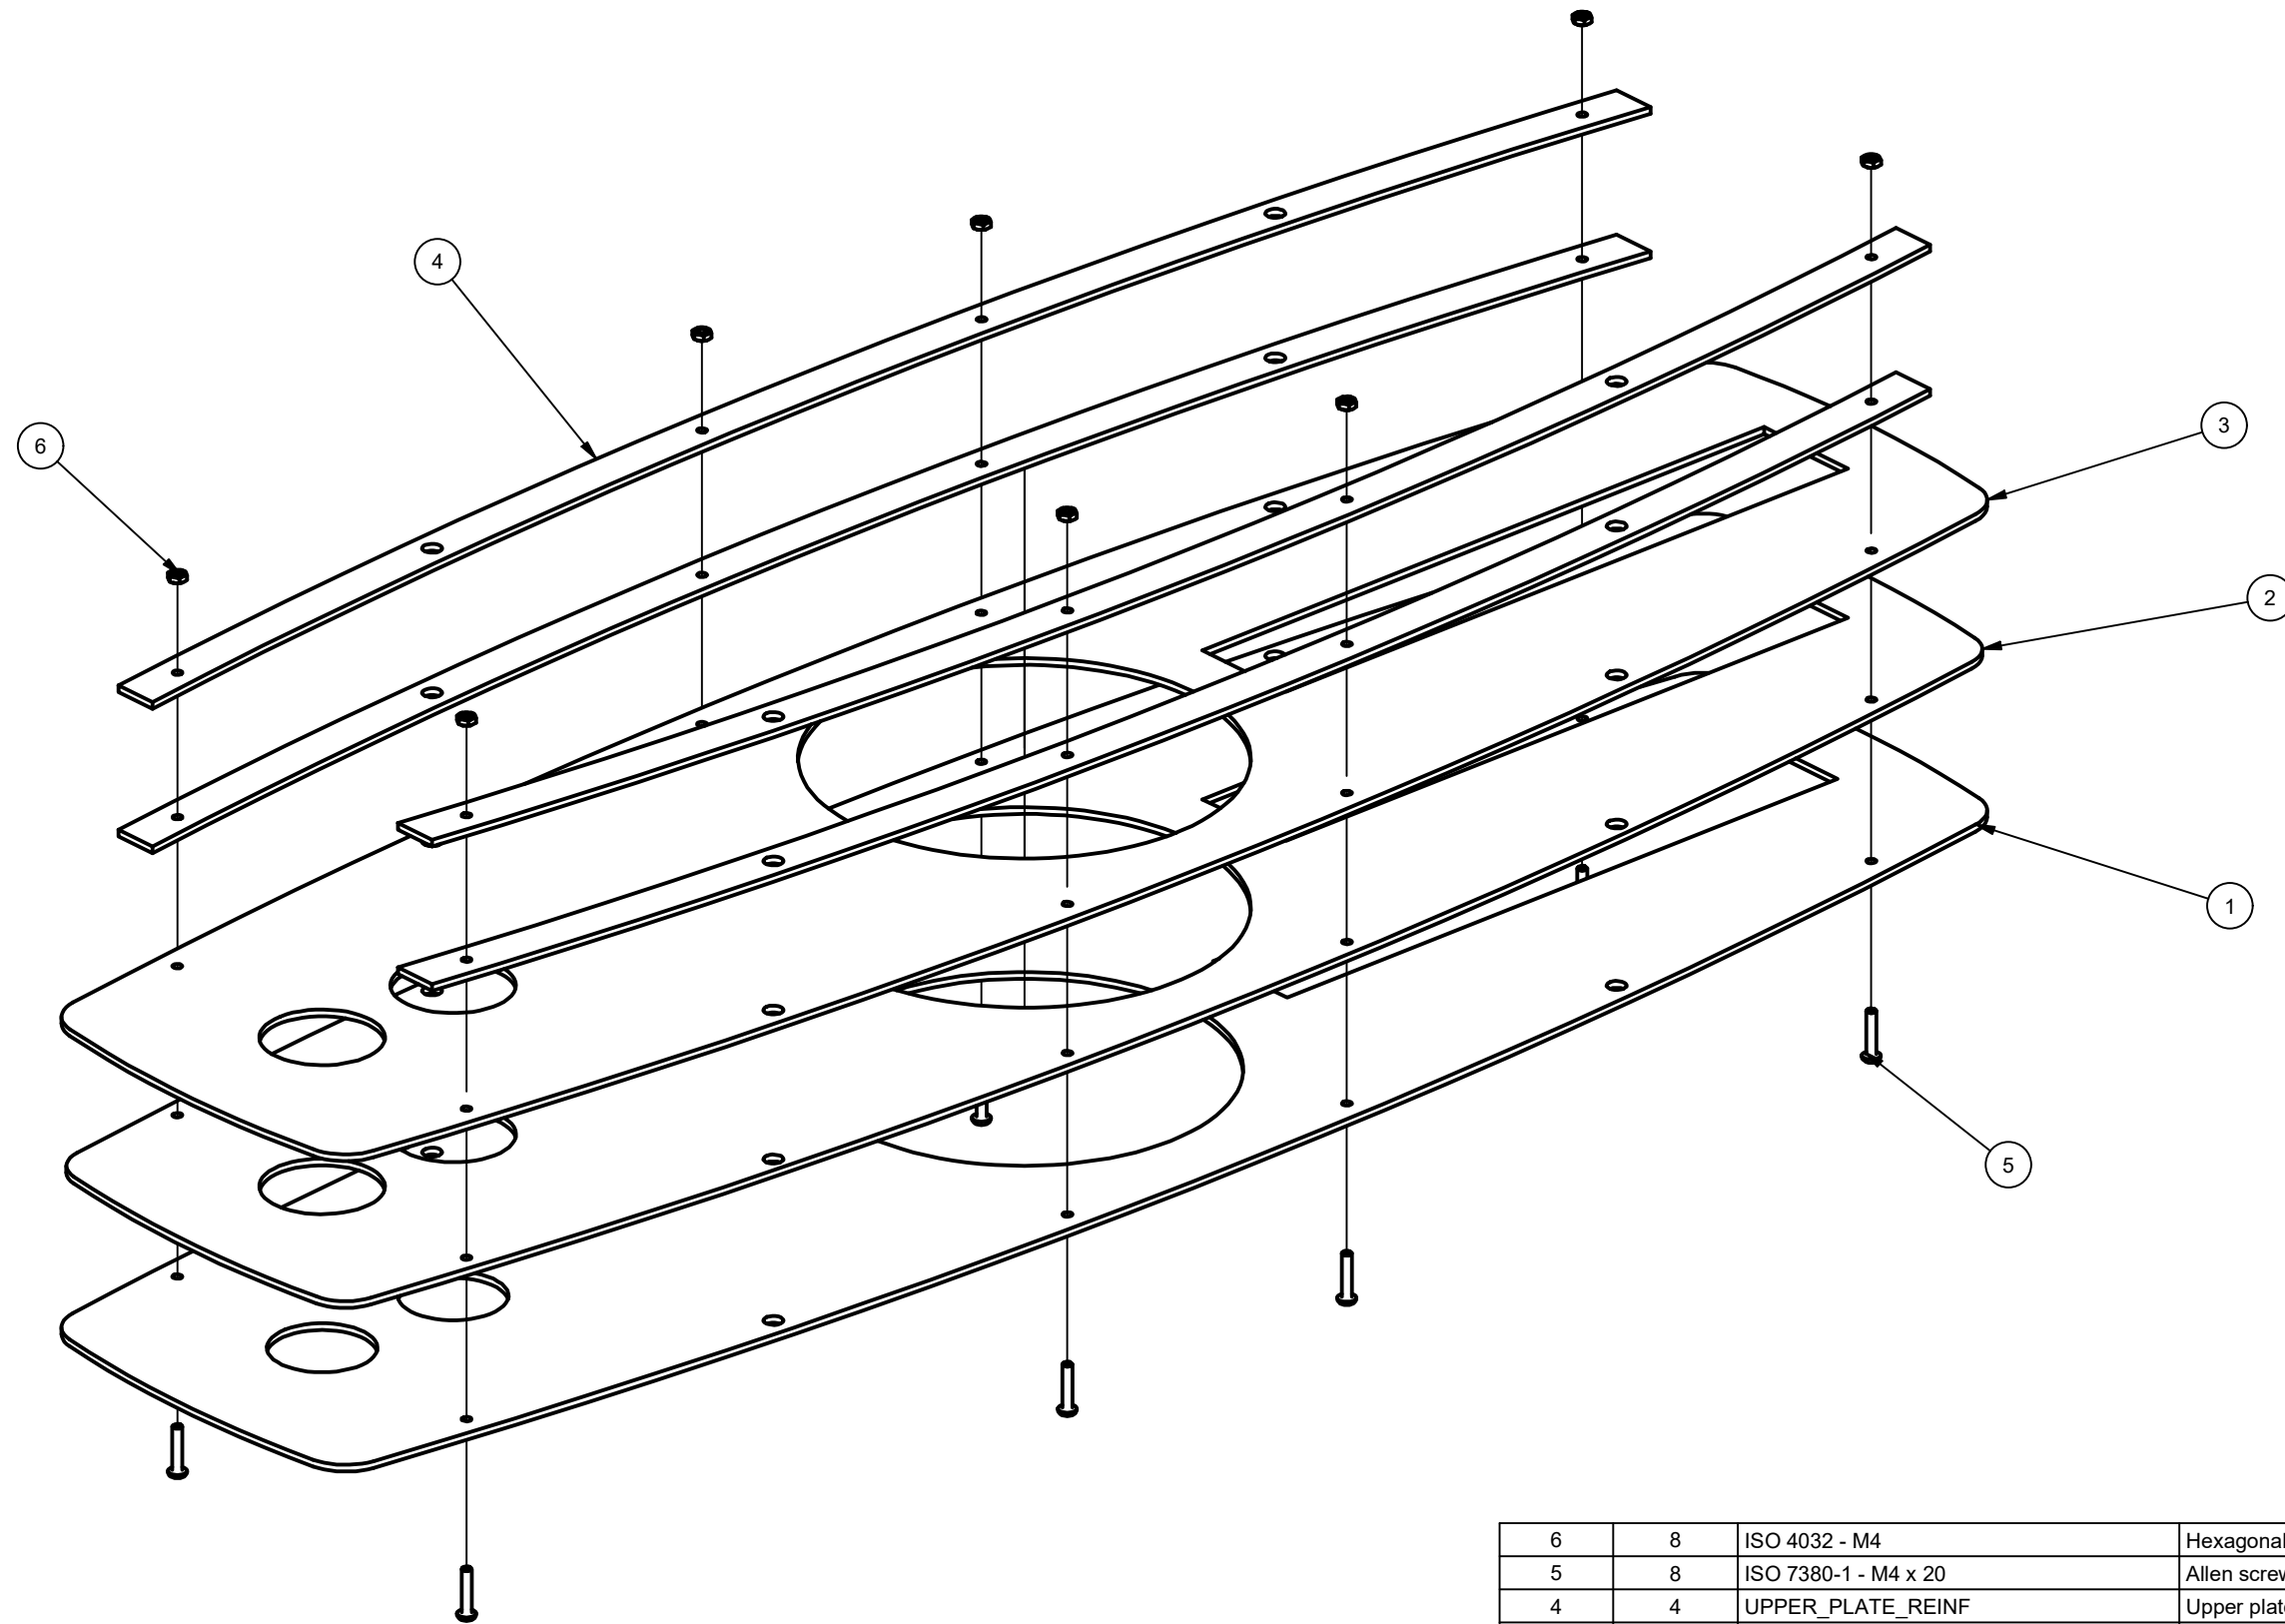

| Item | Quantity | Part                 | Description                                |
|------|----------|----------------------|--------------------------------------------|
| 6    | 8        | ISO 4032 - M4        | Hexagonal nut M4, Stainless steel.         |
| 5    | 8        | ISO 7380-1 - M4 x 20 | Allen screw M4x20mm. Stainless steel.      |
| 4    | 4        | UPPER_PLATE_REINF    | Upper plate, reinforcement part. PMMA 3mm. |
| 3    | 1        | UPPER_PLATE_3        | Upper plate, top part. PMMA 3mm.           |
| 2    | 1        | UPPER_PLATE_2        | Upper plate, middle part. PMMA 3mm.        |
| 1    | 1        | UPPER_PLATE_1        | Upper plate, bottom part. PMMA 3mm.        |

| Name     |                     | Date       | 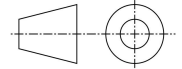  <br><small>Joint FAO/IAEA Programme<br/>Nuclear Techniques in Food and Agriculture</small> | <b>Insect Pest Control Section</b> |                                          |
|----------|---------------------|------------|-------------------------------------------------------------------------------------------------------------------------------------------------------------------------------------------------------------------------------------------------------------------------------------------------------------------------------------------------------------|------------------------------------|------------------------------------------|
| Designed | G. Salvador-Herranz | 10/12/2018 |                                                                                                                                                                                                                                                                                                                                                             |                                    |                                          |
| Revised  | R. Argilés          | 10/12/2018 |                                                                                                                                                                                                                                                                                                                                                             |                                    |                                          |
| Scale    | <b>1:3</b><br>mm    |            | <b>PMMA Aedes Cage v1</b><br>Upper Plate - Assembly                                                                                                                                                                                                                                                                                                         |                                    | Number<br>AEDES_CAGE_V1<br>Sheet<br>4/15 |
