# Supplementary material for: Reducing the cost and assessing the performance of a novel adult mass-rearing cage for the dengue, chikungunya, yellow fever and Zika vector, Aedes aegypti (Linnaeus)
Source: PubMed Central journal article supplement (PMC6779276; doi:10.1371/journal.pntd.0007775), 2019-09-25
Supplement: pntd.0007775.s005.pdf [file pntd.0007775.s005.pdf]

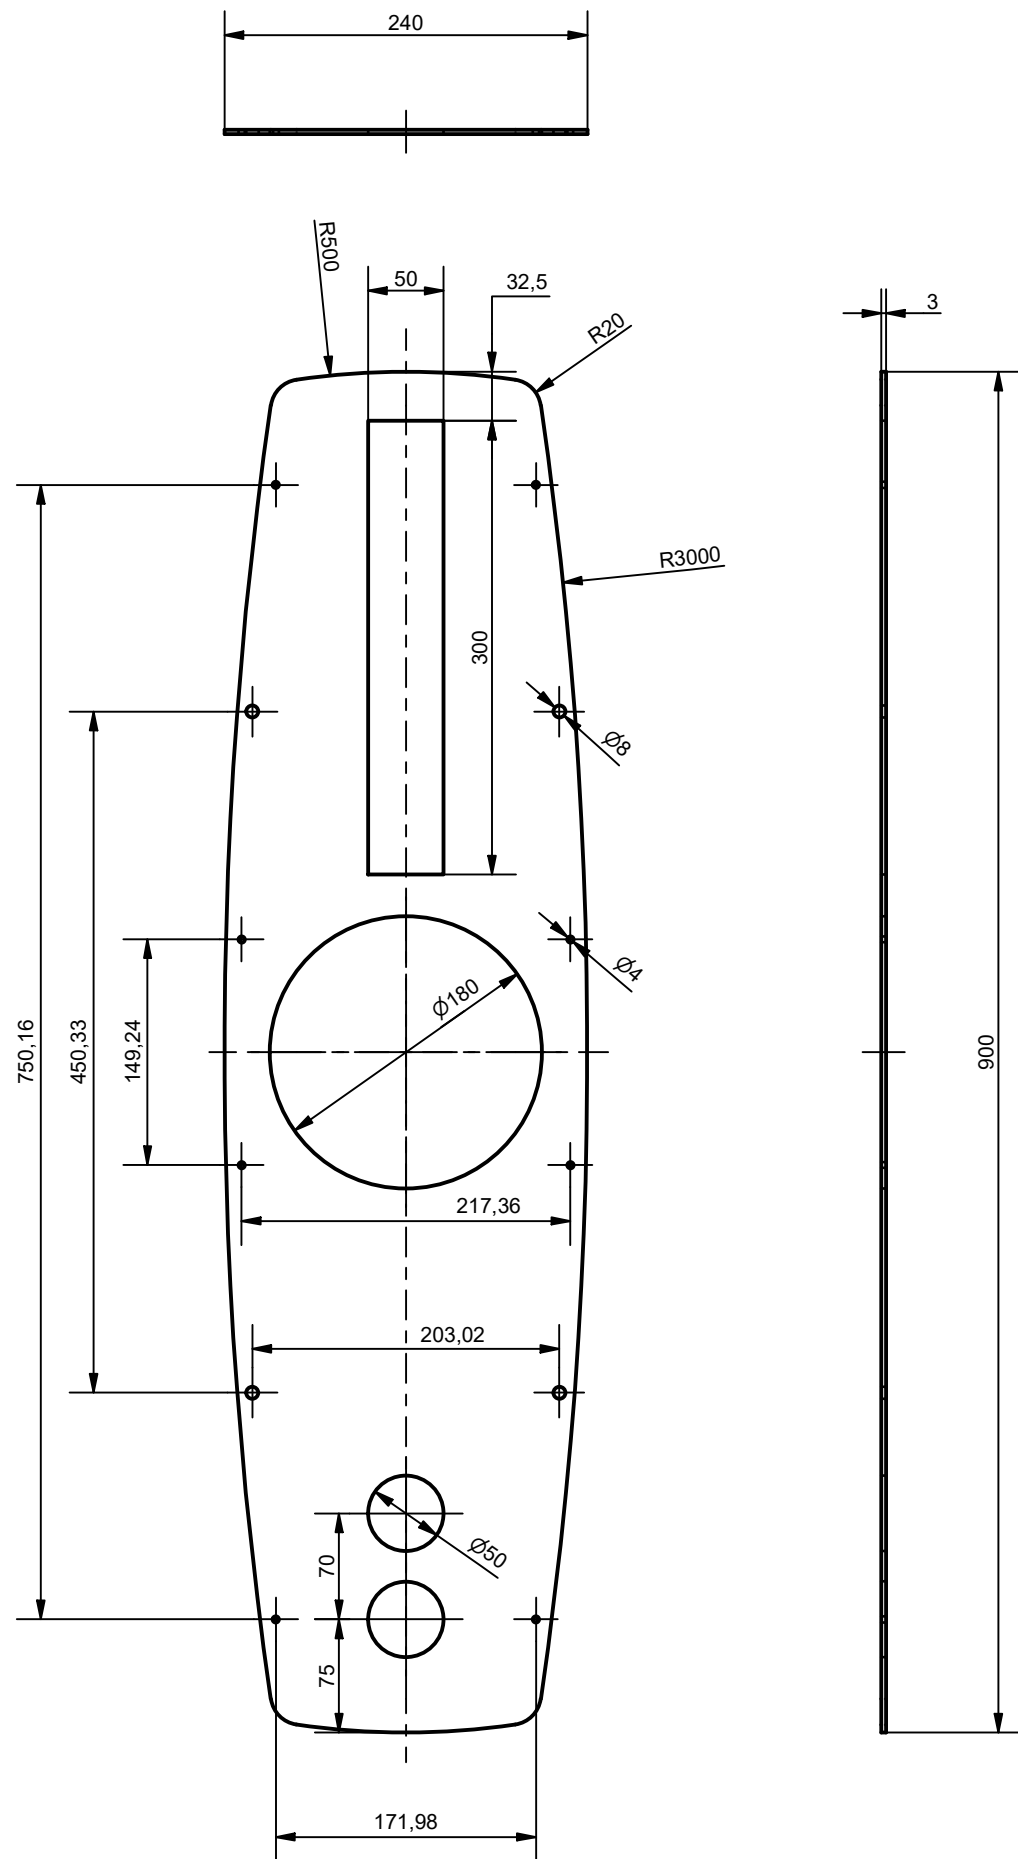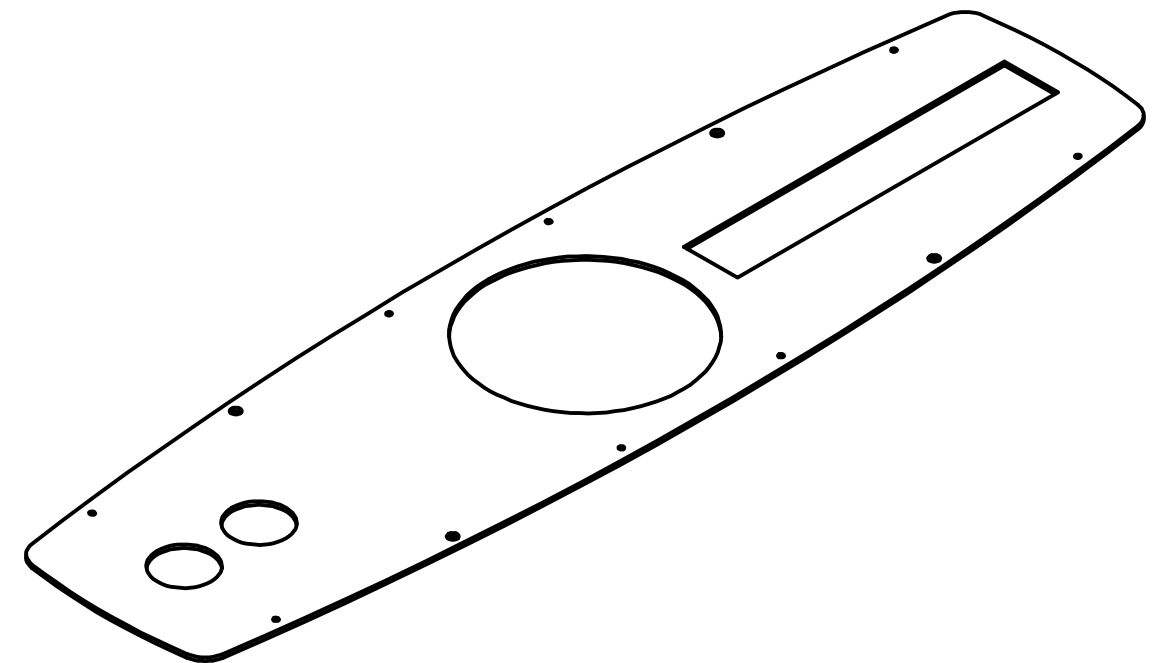

|                                                                     |                     |            |                                                                                                                                                                                                                   |
|---------------------------------------------------------------------|---------------------|------------|-------------------------------------------------------------------------------------------------------------------------------------------------------------------------------------------------------------------|
|                                                                     | Name                | Date       |  <br><b>Insect Pest Control Section</b> |
| Designed                                                            | G. Salvador-Herranz | 10/12/2018 |                                                                                                                                                                                                                   |
| Revised                                                             | R. Argilés          | 10/12/2018 |                                                                                                                                                                                                                   |
| Scale                                                               | <b>1:5</b><br>mm    |            | Number<br><b>AEDES_CAGE_V1</b><br>Sheet<br><b>5/15</b>                                                                                                                                                            |
| <b>PMMA Aedes Cage v1</b><br>Upper Plate - Top Part (UPPER_PLATE_3) |                     |            |                                                                                                                                                                                                                   |
