# Supplementary material for: Reducing the cost and assessing the performance of a novel adult mass-rearing cage for the dengue, chikungunya, yellow fever and Zika vector, Aedes aegypti (Linnaeus)
Source: PubMed Central journal article supplement (PMC6779276; doi:10.1371/journal.pntd.0007775), 2019-09-25
Supplement: pntd.0007775.s006.pdf [file pntd.0007775.s006.pdf]

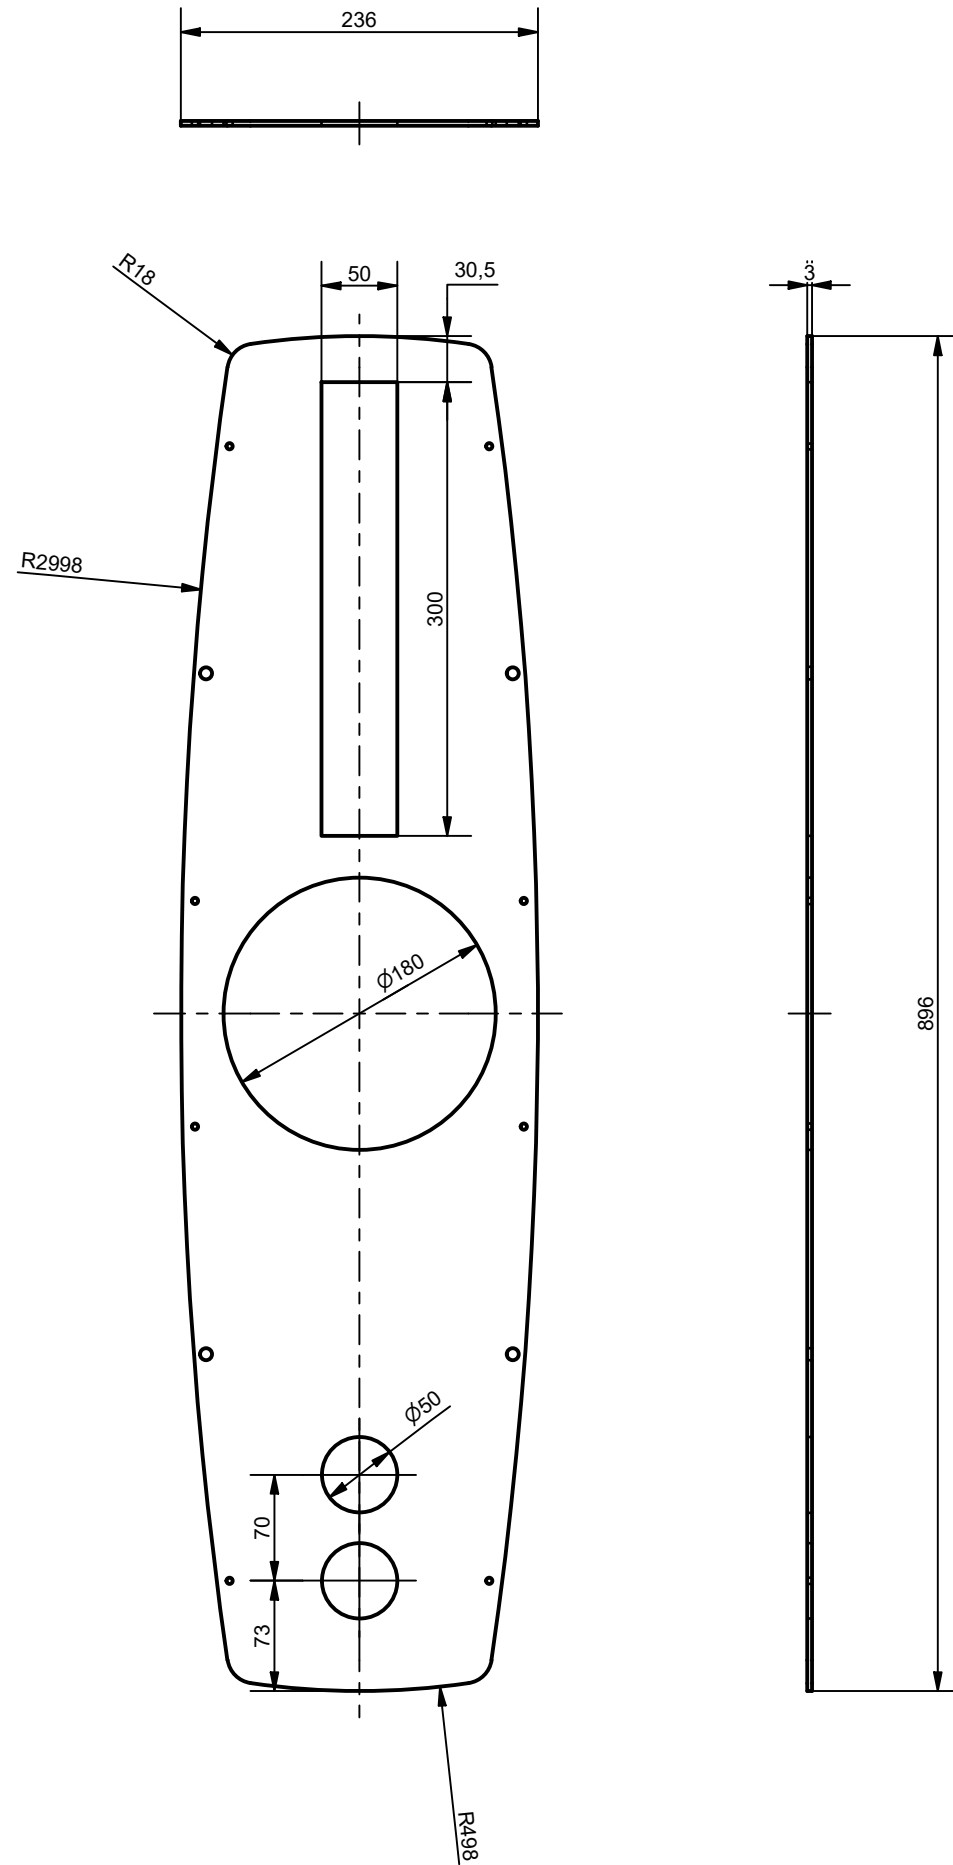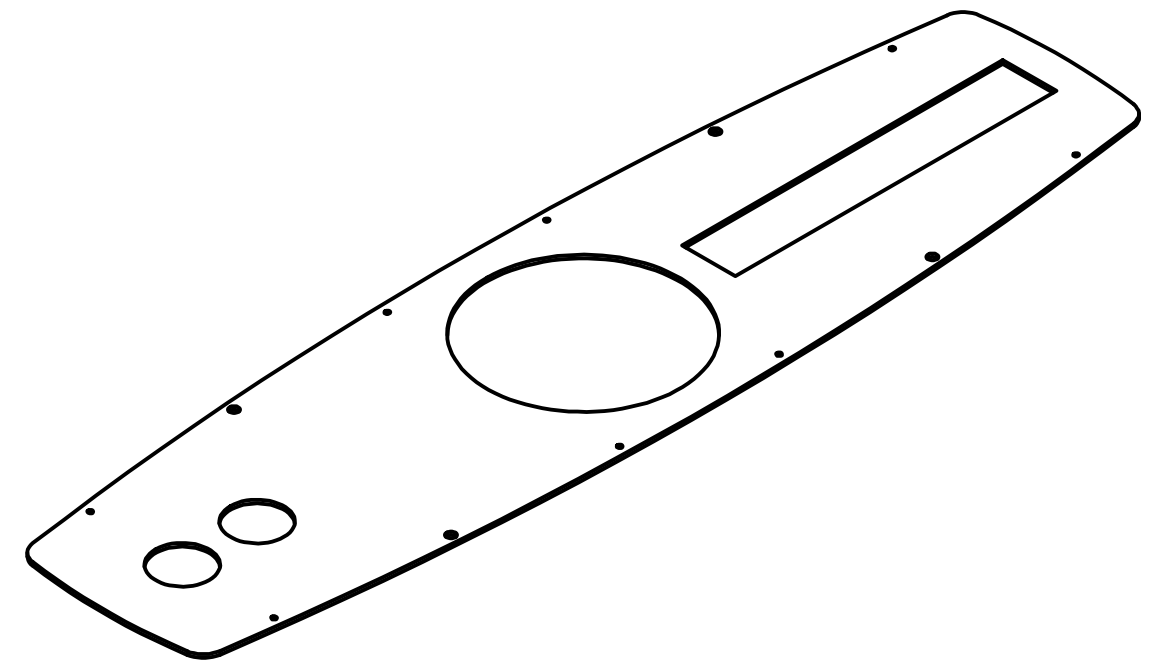

|           |                                           |            |                                                                                                                                                                                                                                                                       |                                    |
|-----------|-------------------------------------------|------------|-----------------------------------------------------------------------------------------------------------------------------------------------------------------------------------------------------------------------------------------------------------------------|------------------------------------|
|           | Name                                      | Date       |  <br><small>Joint FAO/IAEA Programme<br/>Nuclear Techniques in Food and Agriculture</small> | <b>Insect Pest Control Section</b> |
| Designed  | G. Salvador-Herranz                       | 10/12/2018 |                                                                                                                                                                                                                                                                       |                                    |
| Revised   | R. Argilés                                | 10/12/2018 |                                                                                                                                                                                                                                                                       |                                    |
| Scale     | PMMA Aedes Cage v1                        |            |                                                                                                                                                                                                                                                                       | Number<br>AEDES_CAGE_V1            |
| 1:5<br>mm | Upper Plate - Middle Part (UPPER_PLATE_2) |            |                                                                                                                                                                                                                                                                       | Sheet<br>6/15                      |
