# Supplementary material for: Reducing the cost and assessing the performance of a novel adult mass-rearing cage for the dengue, chikungunya, yellow fever and Zika vector, Aedes aegypti (Linnaeus)
Source: PubMed Central journal article supplement (PMC6779276; doi:10.1371/journal.pntd.0007775), 2019-09-25
Supplement: pntd.0007775.s009.pdf [file pntd.0007775.s009.pdf]

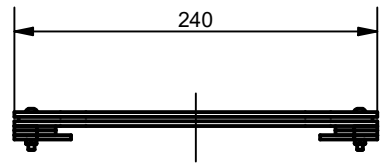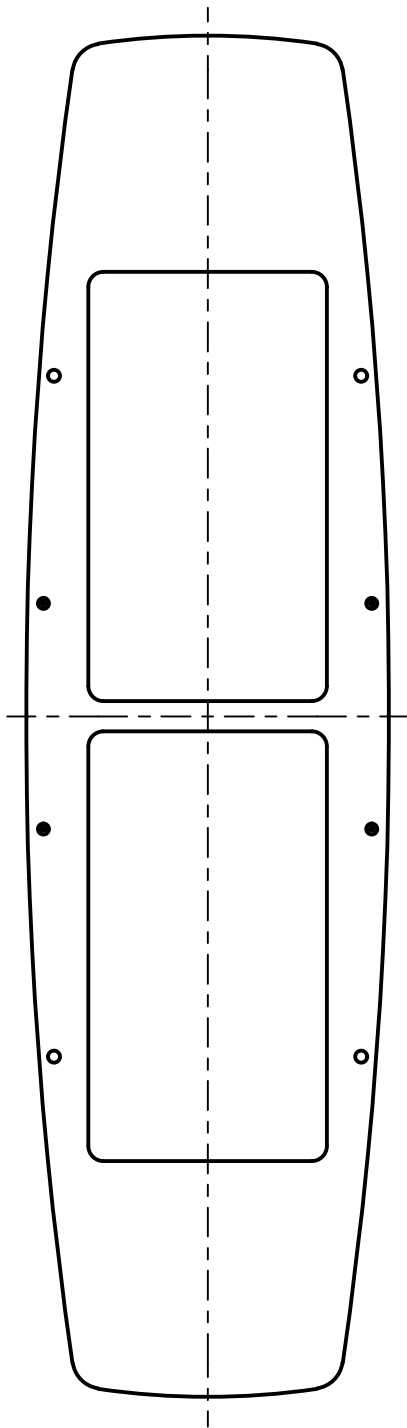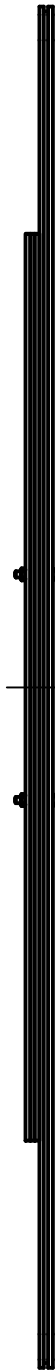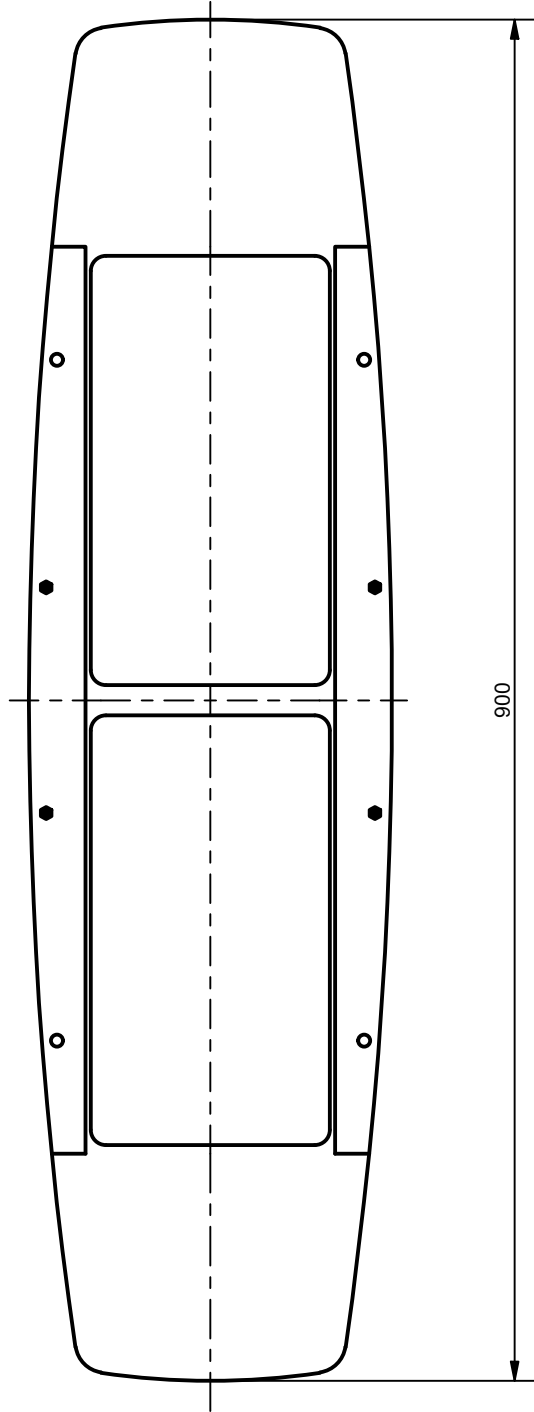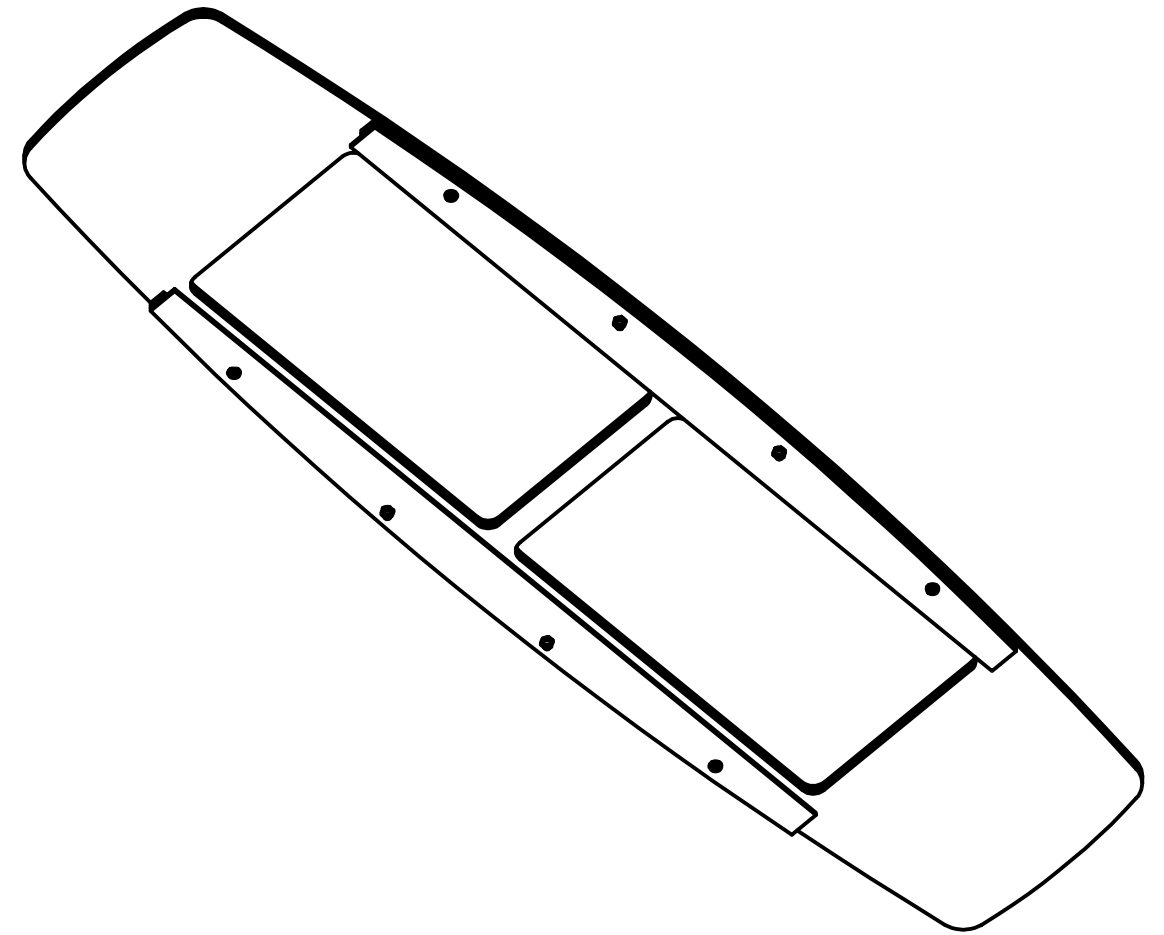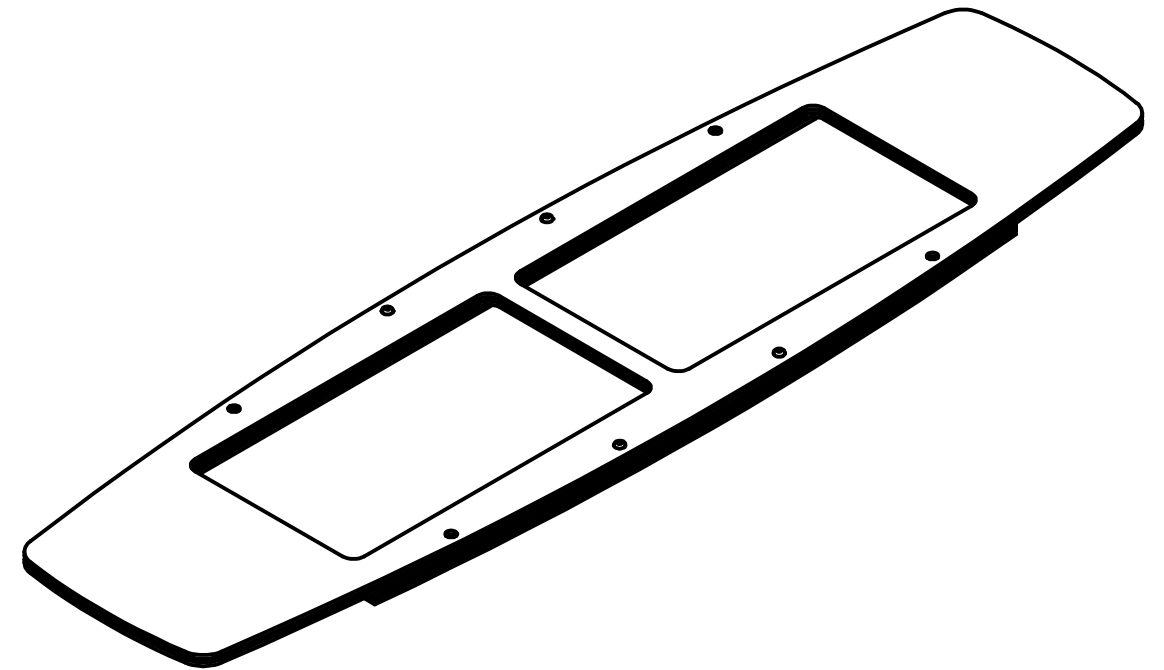

|          |                                                                         |            |                                                                                                                                                                                                                                                       |                                    |
|----------|-------------------------------------------------------------------------|------------|-------------------------------------------------------------------------------------------------------------------------------------------------------------------------------------------------------------------------------------------------------|------------------------------------|
|          | Name                                                                    | Date       |  <br>Joint FAO/IAEA Programme<br>Nuclear Techniques in Food and Agriculture | <b>Insect Pest Control Section</b> |
| Designed | G. Salvador-Herranz                                                     | 10/12/2018 |                                                                                                                                                                                                                                                       |                                    |
| Revised  | R. Argilés                                                              | 10/12/2018 |                                                                                                                                                                                                                                                       |                                    |
| Scale    | <b>PMMA Aedes Cage v1</b><br>Bottom Plate - Overall View (BOTTOM_PLATE) |            |                                                                                                                                                                                                                                                       | Number<br>AEDES_CAGE_V1            |
|          |                                                                         |            |                                                                                                                                                                                                                                                       | Sheet<br>9/15                      |
