# Supplementary material for: Reducing the cost and assessing the performance of a novel adult mass-rearing cage for the dengue, chikungunya, yellow fever and Zika vector, Aedes aegypti (Linnaeus)
Source: PubMed Central journal article supplement (PMC6779276; doi:10.1371/journal.pntd.0007775), 2019-09-25
Supplement: pntd.0007775.s010.pdf [file pntd.0007775.s010.pdf]

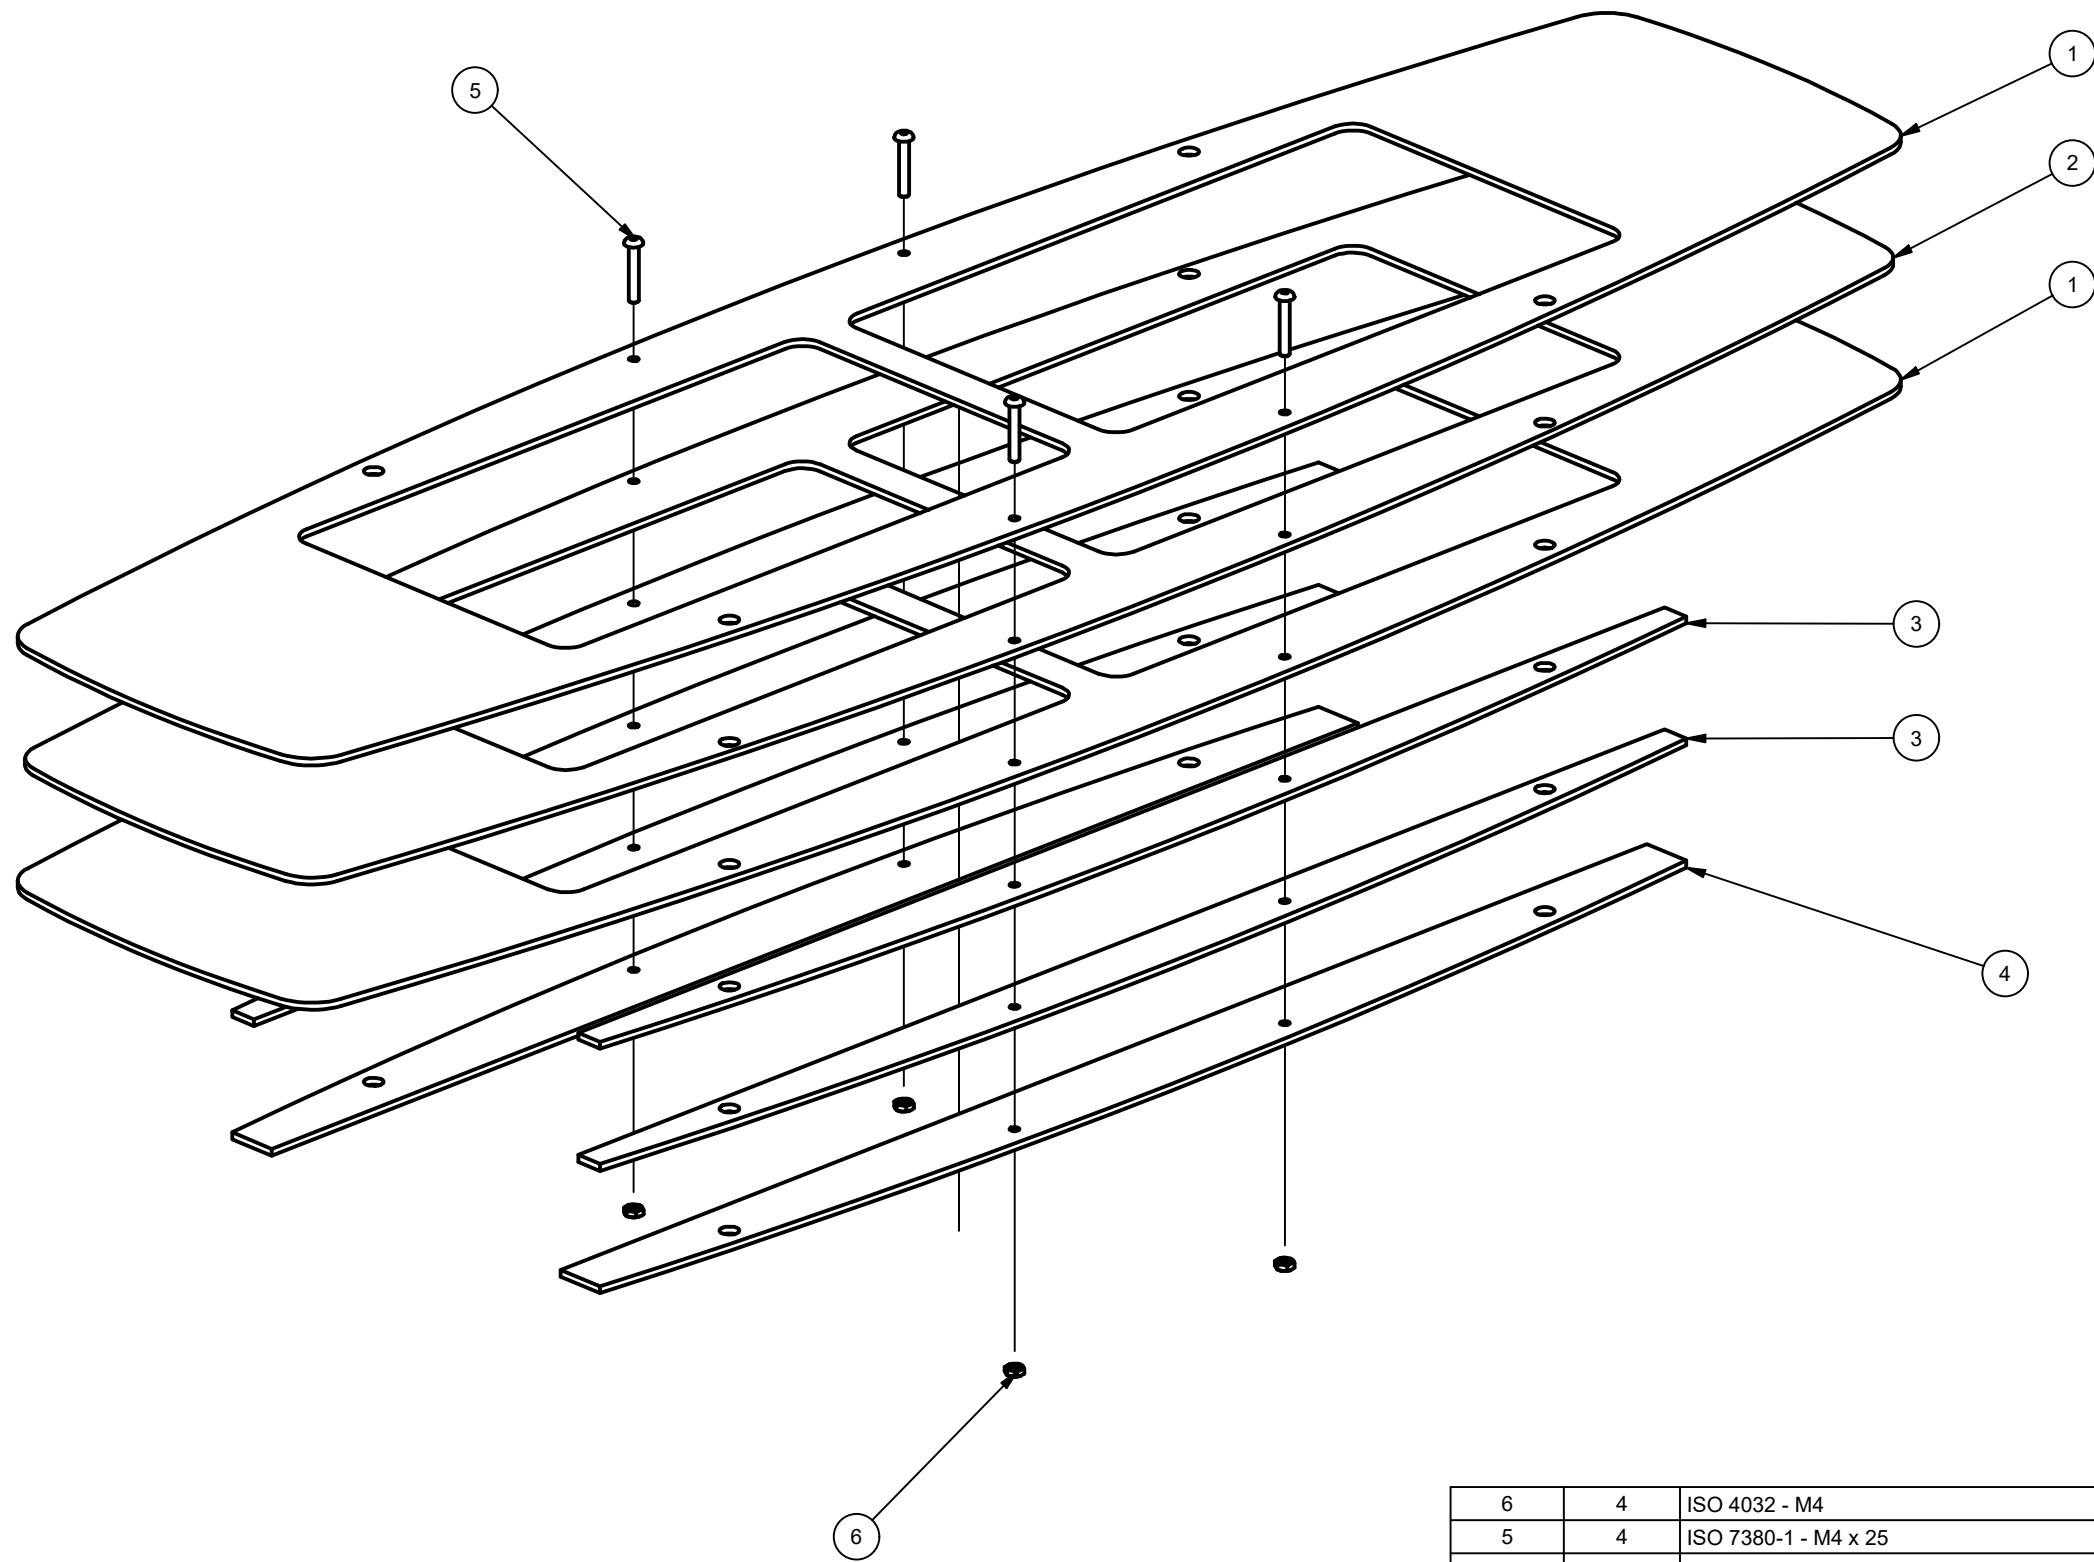

| 6         | 4                                                                                     | ISO 4032 - M4           | Hexagonal Nut M4. Sainless steel.                                                                                                                                                                                                                     |
|-----------|---------------------------------------------------------------------------------------|-------------------------|-------------------------------------------------------------------------------------------------------------------------------------------------------------------------------------------------------------------------------------------------------|
| 5         | 4                                                                                     | ISO 7380-1 - M4 x 25    | Allen screw M4x25mm. Sainless steel.                                                                                                                                                                                                                  |
| 4         | 2                                                                                     | BOTTOM_PLATE_GUIDANCE_2 | Wide guidance part. PMMA 3mm.                                                                                                                                                                                                                         |
| 3         | 4                                                                                     | BOTTOM_PLATE_GUIDANCE_1 | Narrow guidance part. PMMA 3mm.                                                                                                                                                                                                                       |
| 2         | 1                                                                                     | BOTTOM_PLATE_2          | Middle plate. PMMA 3mm                                                                                                                                                                                                                                |
| 1         | 2                                                                                     | BOTTOM_PLATE_1          | Top and bottom plates. PMMA 3mm                                                                                                                                                                                                                       |
| Item      | Quantity                                                                              | Part                    | Description                                                                                                                                                                                                                                           |
|           |                                                                                       | Name                    | Date                                                                                                                                                                                                                                                  |
| Designed  | G. Salvador-Herranz                                                                   | 10/12/2018              |  <br>Joint FAO/IAEA Programme<br>Nuclear Techniques in Food and Agriculture |
| Revised   | R. Argilés                                                                            | 10/12/2018              |                                                                                                                                                                                                                                                       |
| Scale     |  |                         | <b>Insect Pest Control Section</b>                                                                                                                                                                                                                    |
| 1:3<br>mm | <b>PMMA Aedes Cage v1</b><br>Bottom Plate - Assembly                                  |                         |                                                                                                                                                                                                                                                       |
