# Supplementary material for: Reducing the cost and assessing the performance of a novel adult mass-rearing cage for the dengue, chikungunya, yellow fever and Zika vector, Aedes aegypti (Linnaeus)
Source: PubMed Central journal article supplement (PMC6779276; doi:10.1371/journal.pntd.0007775), 2019-09-25
Supplement: pntd.0007775.s012.pdf [file pntd.0007775.s012.pdf]

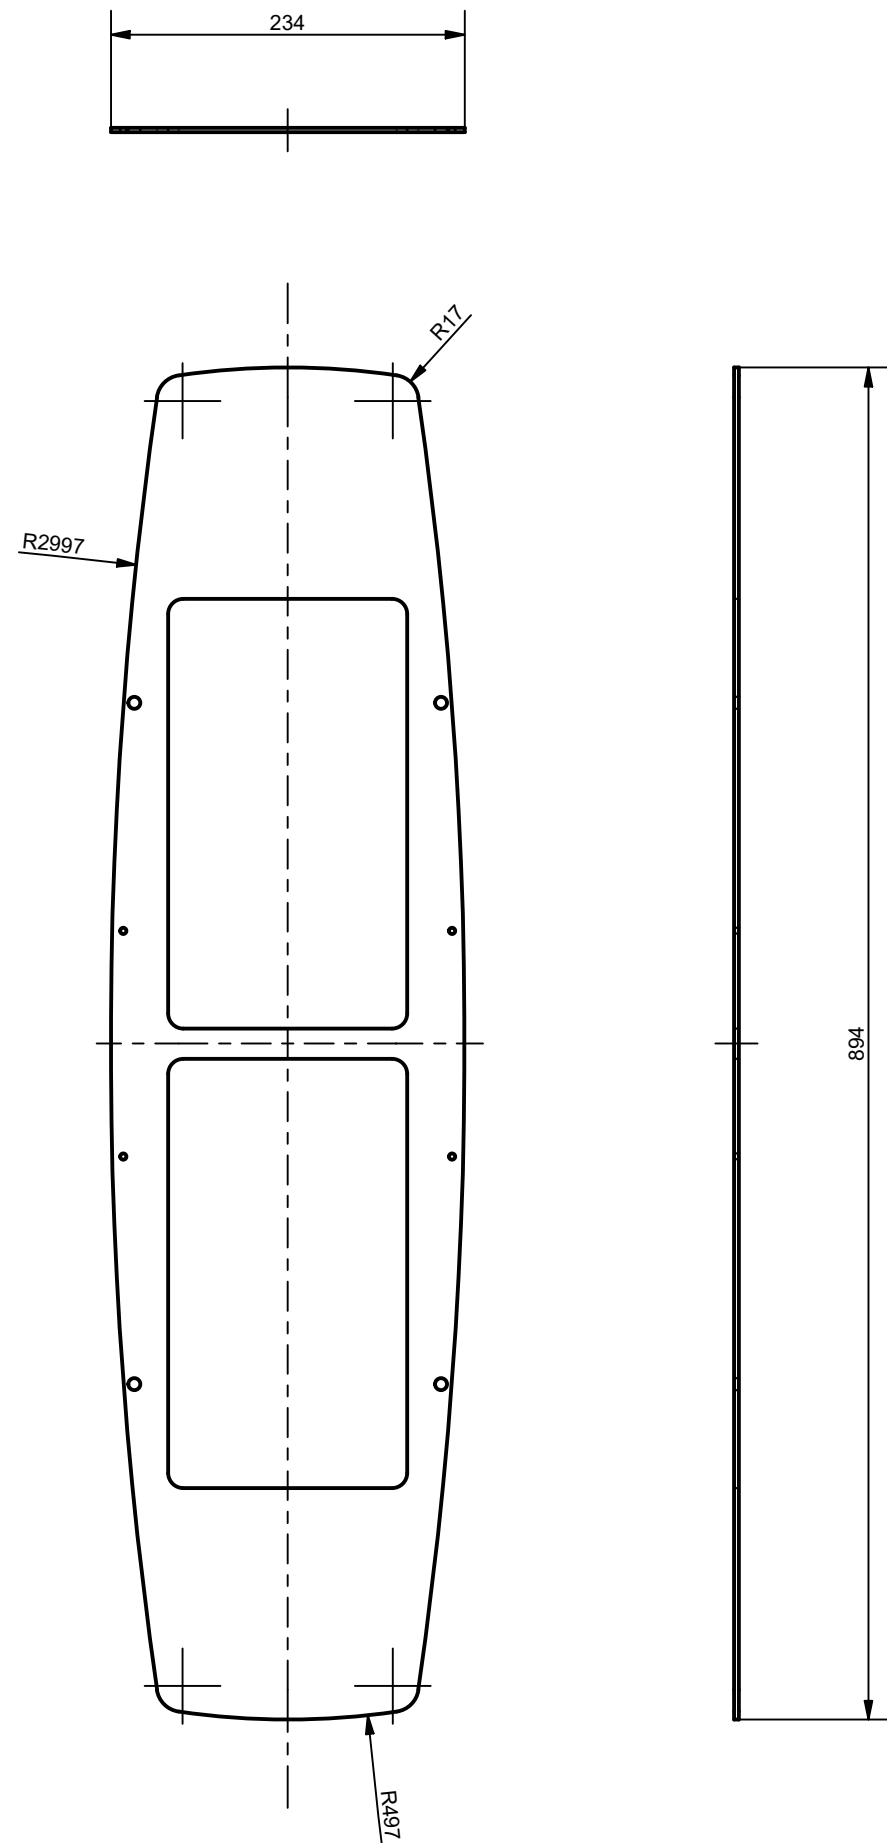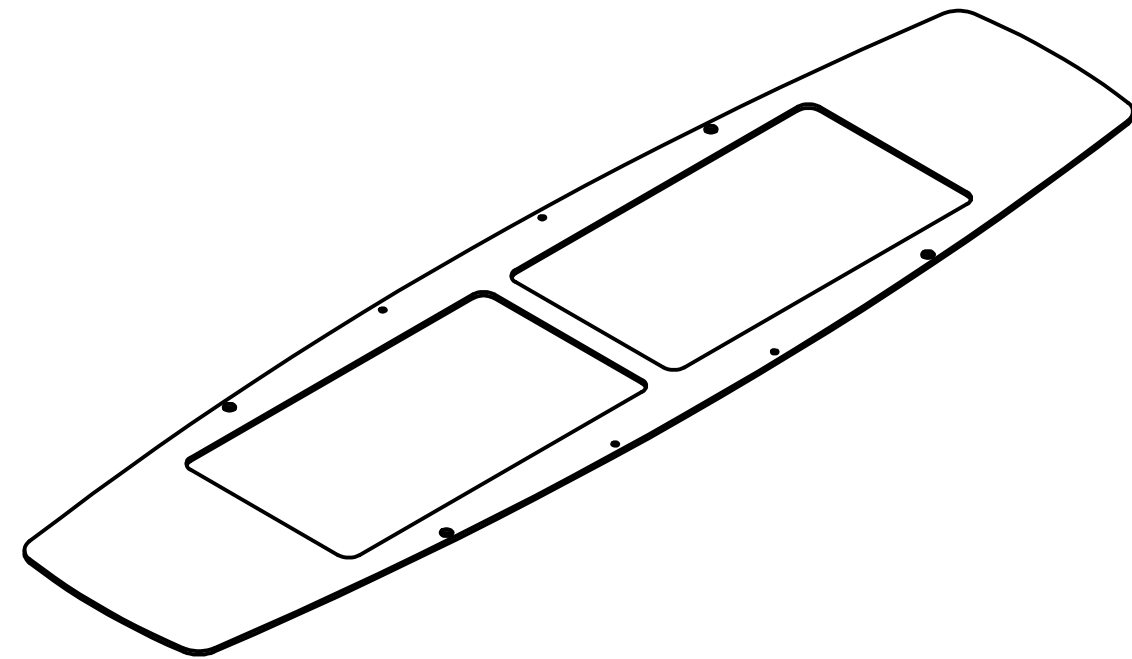

|            |                                             |            |                                                                                                                                                                                                                                                                                   |                                    |
|------------|---------------------------------------------|------------|-----------------------------------------------------------------------------------------------------------------------------------------------------------------------------------------------------------------------------------------------------------------------------------|------------------------------------|
|            | Name                                        | Date       |  <br><small>Joint FAO/IAEA Programme</small><br><small>Wheat Technology in Food and Agriculture</small> | <b>Insect Pest Control Section</b> |
| Designed   | G. Salvador-Herranz                         | 10/12/2018 |                                                                                                                                                                                                                                                                                   |                                    |
| Revised    | R. Argilés                                  | 10/12/2018 |                                                                                                                                                                                                                                                                                   |                                    |
| Scale      | <b>PMMA Aedes Cage v1</b>                   |            |                                                                                                                                                                                                                                                                                   | Number                             |
| <b>1:5</b> | Bottom Plate - Middle Part (BOTTOM_PLATE_2) |            |                                                                                                                                                                                                                                                                                   | AEDES_CAGE_V1                      |
| mm         |                                             |            |                                                                                                                                                                                                                                                                                   | Sheet                              |
|            |                                             |            |                                                                                                                                                                                                                                                                                   | 12/15                              |
