# Supplementary material for: Reducing the cost and assessing the performance of a novel adult mass-rearing cage for the dengue, chikungunya, yellow fever and Zika vector, Aedes aegypti (Linnaeus)
Source: PubMed Central journal article supplement (PMC6779276; doi:10.1371/journal.pntd.0007775), 2019-09-25
Supplement: pntd.0007775.s014.pdf [file pntd.0007775.s014.pdf]

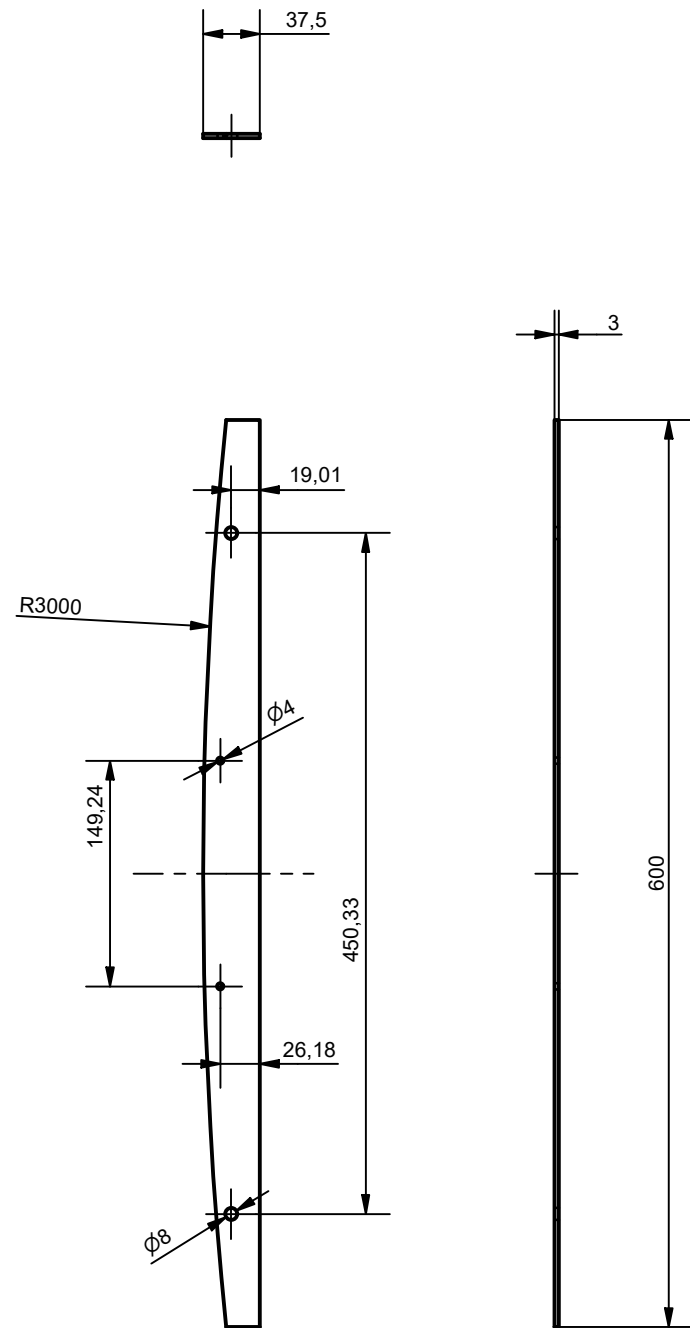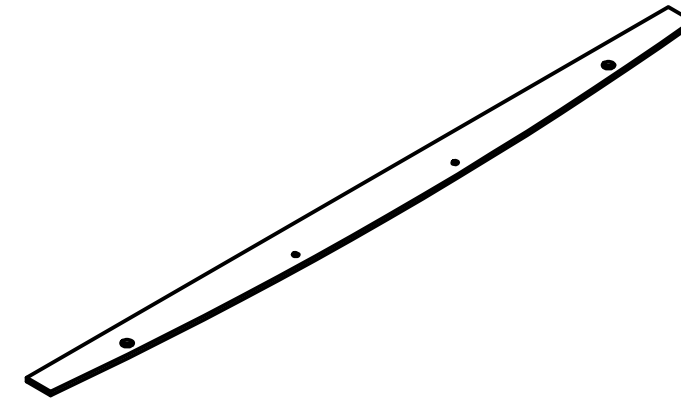

|           |                                                                                          |            |                                                                                                                                                                                                                                                       |                                    |
|-----------|------------------------------------------------------------------------------------------|------------|-------------------------------------------------------------------------------------------------------------------------------------------------------------------------------------------------------------------------------------------------------|------------------------------------|
|           | Name                                                                                     | Date       |  <br>Joint FAO/IAEA Programme<br>Nuclear Techniques in Food and Agriculture | <b>Insect Pest Control Section</b> |
| Designed  | G. Salvador-Herranz                                                                      | 10/12/2018 |                                                                                                                                                                                                                                                       |                                    |
| Revised   | R. Argilés                                                                               | 10/12/2018 |                                                                                                                                                                                                                                                       |                                    |
| Scale     | <b>PMMA Aedes Cage v1</b><br>Bottom Plate - Wide Guidance Part (BOTTOM_PLATE_GUIDANCE_2) |            |                                                                                                                                                                                                                                                       | Number<br>AEDES_CAGE_V1            |
| 1:5<br>mm |                                                                                          |            |                                                                                                                                                                                                                                                       | Sheet<br>14/15                     |
