# Supplementary material for: Reducing the cost and assessing the performance of a novel adult mass-rearing cage for the dengue, chikungunya, yellow fever and Zika vector, Aedes aegypti (Linnaeus)
Source: PubMed Central journal article supplement (PMC6779276; doi:10.1371/journal.pntd.0007775), 2019-09-25
Supplement: pntd.0007775.s015.pdf [file pntd.0007775.s015.pdf]

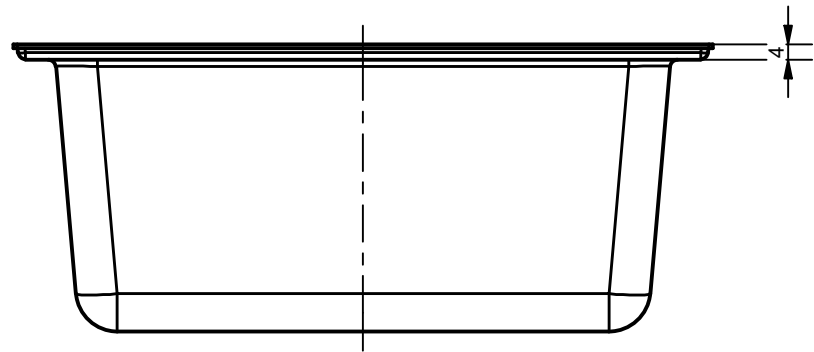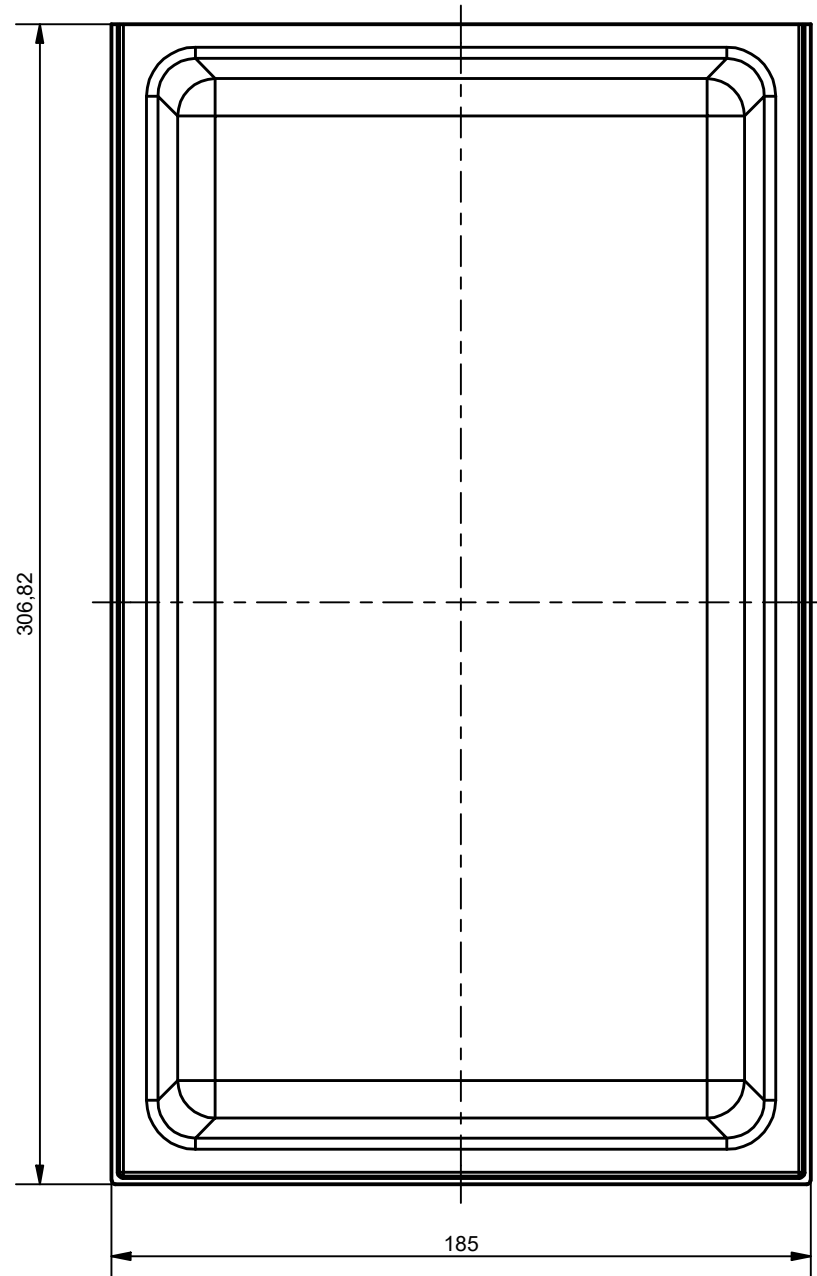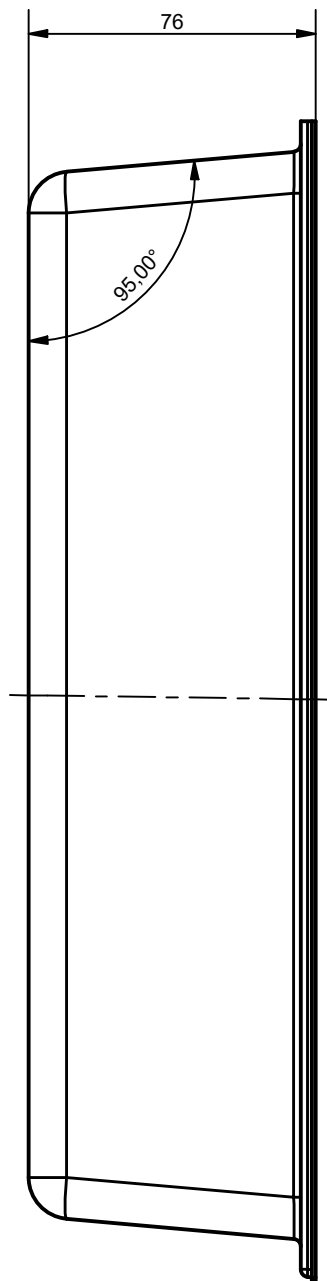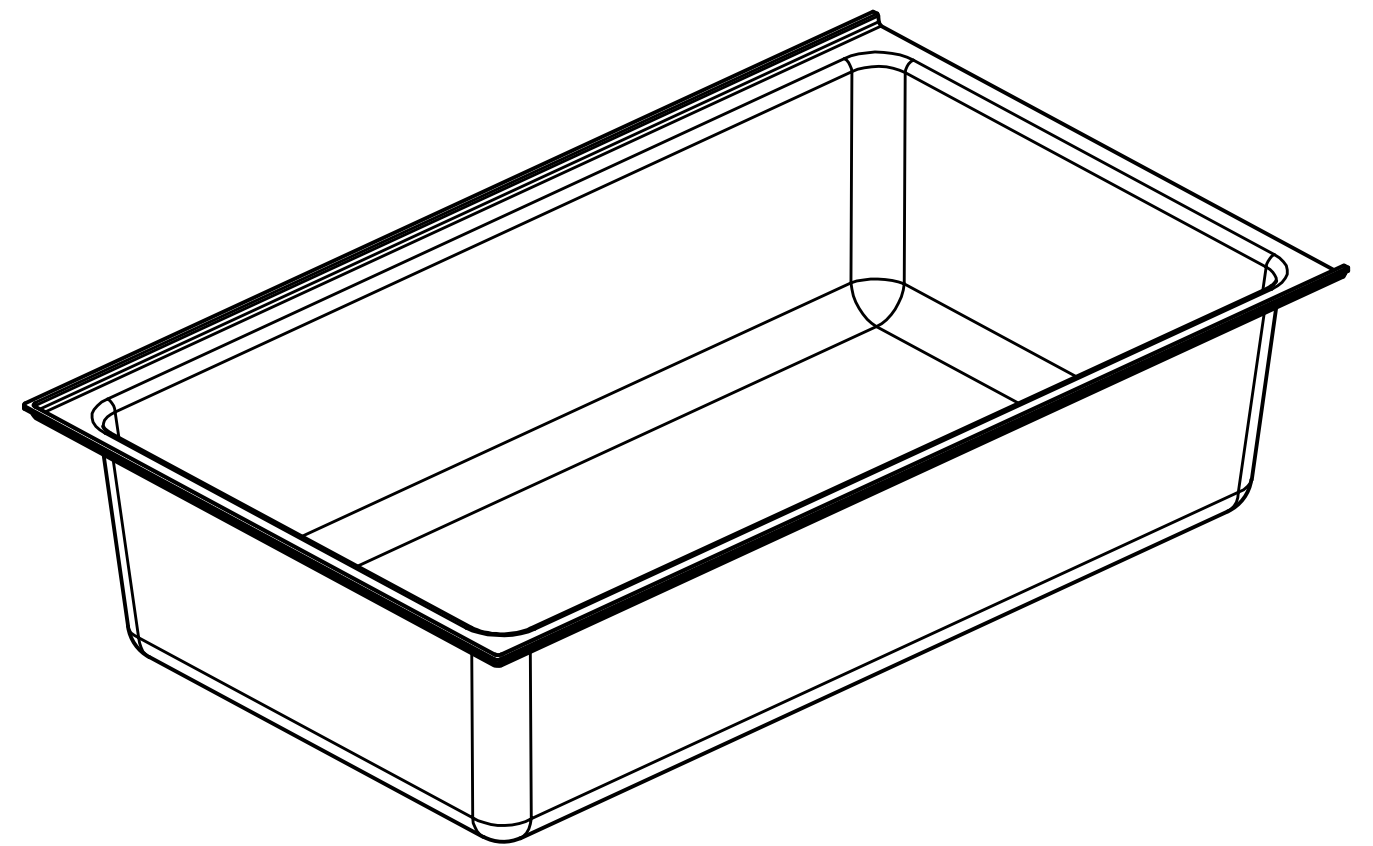

|            |                                                   |            |                                                                                                                                                                                                                                                                   |                                    |
|------------|---------------------------------------------------|------------|-------------------------------------------------------------------------------------------------------------------------------------------------------------------------------------------------------------------------------------------------------------------|------------------------------------|
|            | Name                                              | Date       | 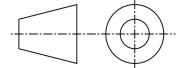   | <b>Insect Pest Control Section</b> |
| Designed   | G. Salvador-Herranz                               | 10/12/2018 |                                                                                                                                                                                                                                                                   |                                    |
| Revised    | R. Argilés                                        | 10/12/2018 |                                                                                                                                                                                                                                                                   |                                    |
| Scale      | <b>PMMA Aedes Cage v1</b>                         |            |                                                                                                                                                                                                                                                                   | Number                             |
| <b>1:2</b> | Egg Collection Tray - Overall View (COLLECT_TRAY) |            |                                                                                                                                                                                                                                                                   | <b>AEDES_CAGE_V1</b>               |
| mm         |                                                   |            |                                                                                                                                                                                                                                                                   | Sheet                              |
|            |                                                   |            |                                                                                                                                                                                                                                                                   | <b>15/15</b>                       |
